# Supplementary material
Source: PubMed Central journal article supplement (PMC9841783)
Supplement: pt2c00206_si_001.pdf [file pt2c00206_si_001.pdf]

## Supporting Information

### ***Broad-spectrum Cyclopropane-based Inhibitors of Coronavirus 3C-like Proteases: Biochemical, Structural, and Virological Studies.***

Chamandi S. Dampalla<sup>1</sup>, Harry Nhat Nguyen<sup>1</sup>, Athri D. Rathnayake<sup>1</sup>, Yunjeong Kim<sup>2</sup>,  
Krishani Dinali Perera<sup>2</sup>, Trent K. Madden<sup>1</sup>, Hayden A. Thurman,<sup>1</sup> Alexandra J. Machen<sup>3</sup>,  
Maithri M. Kashipathy<sup>3</sup>, Lijun Liu<sup>3</sup>, Kevin P. Battaile<sup>4</sup>, Scott Lovell,<sup>3</sup> Kyeong-Ok Chang,<sup>2\*</sup>  
William C. Groutas,<sup>1\*</sup>

<sup>1</sup>Department of Chemistry and Biochemistry, Wichita State University, Wichita, Kansas 67260, USA

<sup>2</sup>Department of Diagnostic Medicine & Pathobiology, College of Veterinary Medicine, Kansas State University, Manhattan, Kansas 66506, USA

<sup>3</sup>Protein Structure and X-ray Crystallography Laboratory, The University of Kansas, Lawrence, Kansas 66047, USA

<sup>4</sup>NYX, New York Structural Biology Center, Upton, NY 11973, USA

\*authors to whom correspondence should be addressed.

Department of Chemistry and Biochemistry, Wichita State University, Wichita, KS 67260  
Tel. (316) 978 7374  
e-mail: bill.groutas@wichita.edu

Department of Diagnostic Medicine & Pathobiology, College of Veterinary Medicine, Kansas State University, Manhattan, KS 66506  
Tel. (785) 532 3849  
e-mail: kchang@vet.ksu.edu

| <b><u>Table of Contents</u></b>                               | <b><u>Page Numbers</u></b> |
|---------------------------------------------------------------|----------------------------|
| Figure S1                                                     | 3                          |
| Scheme S1                                                     | 4                          |
| Scheme S2                                                     | 5                          |
| Synthesis of compounds <b><i>1c/d-17c/d</i></b>               | 6-11                       |
| Characterization of compounds <b><i>1c/d-17c/d</i></b>        | 12-40                      |
| Determination of purity of compounds <b><i>1c-d-17c/d</i></b> | 41-46                      |
| Table S1                                                      | 47-48                      |
| Table S2                                                      | 49-50                      |

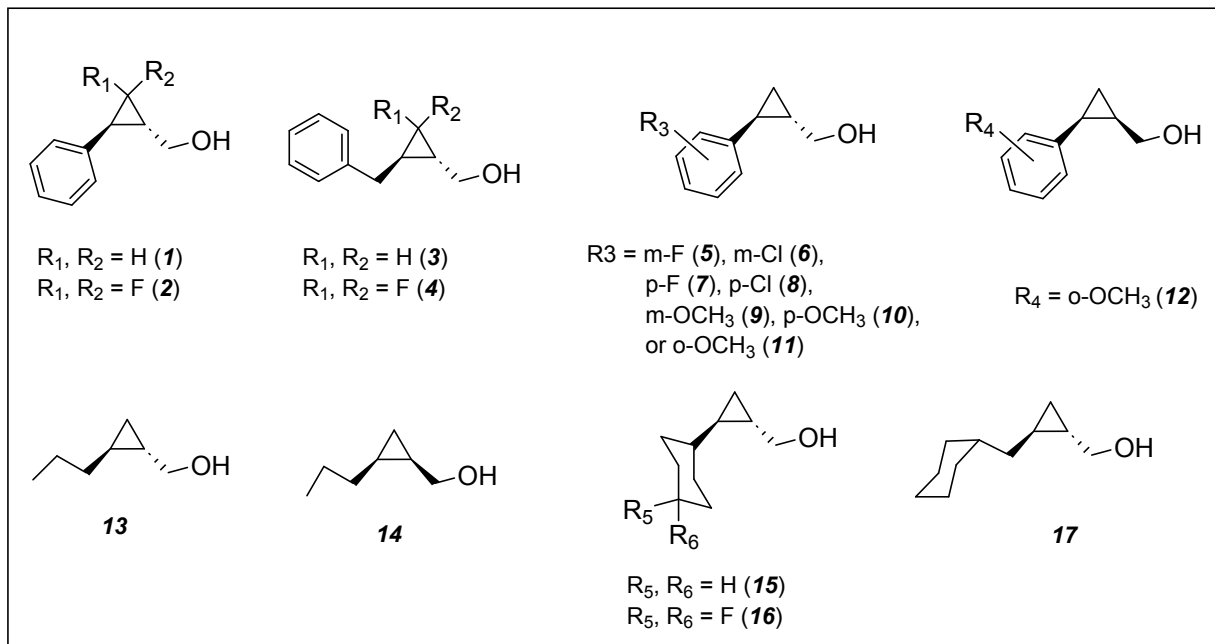

**Figure S1. Alcohol inputs 1-17**

### Scheme S1. Synthesis of Alcohol Inputs 1-17

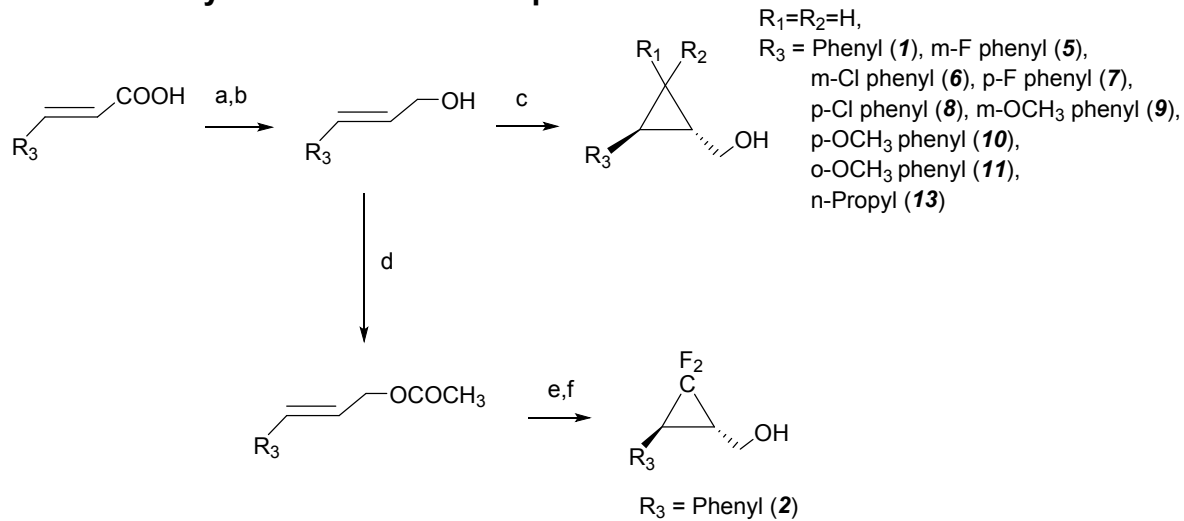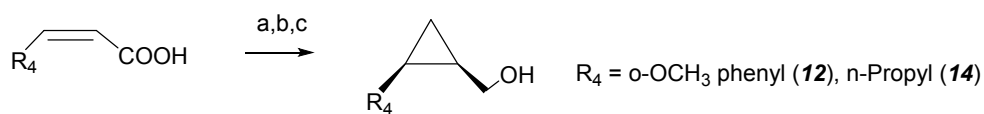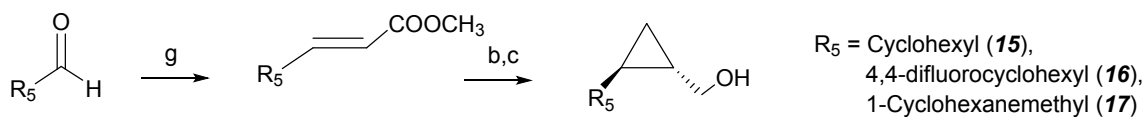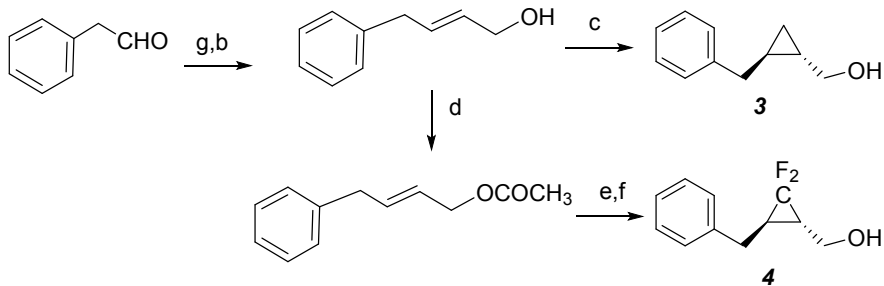

<sup>a</sup>  $\text{CH}_3\text{I}/\text{Cs}_2\text{CO}_3/\text{ACN}/\text{reflux}/2\text{h},$  <sup>b</sup>  $\text{DIBAL}/\text{DCM}/0-5^\circ\text{C}/2\text{h},$  <sup>c</sup>  $\text{Et}_2\text{Zn}/\text{CH}_2\text{I}_2/\text{DCM}/0-5^\circ\text{C}/30 \text{ min}/\text{then RT}/\text{overnight},$

<sup>d</sup>  $(\text{CH}_3\text{CO})_2\text{O}/\text{TEA}/4\text{-DMAP}/\text{RT}/\text{overnight},$  <sup>e</sup>  $\text{TFDA}/\text{NaF}/\text{Toluene}/130-135^\circ\text{C}/2\text{h},$  <sup>f</sup>  $\text{LiOH}_{\text{aq}}/\text{THF}/\text{RT}/3\text{h},$

<sup>g</sup>  $\text{NaH}/(\text{CH}_3\text{O})_2\text{P}(\text{O})\text{CH}_2\text{COOCH}_3/\text{DCM}/\text{RT}/\text{overnight}.$

### Scheme S2. General Synthesis of Inhibitors 1-17c/d

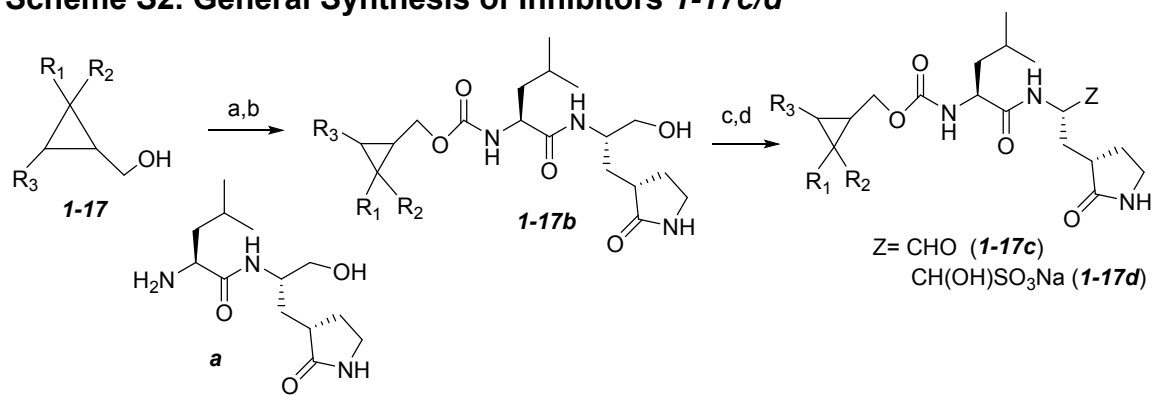

<sup>a</sup> DSC/TEA/ACN/RT/4h, <sup>b</sup> a/TEA/DCM/RT/3h, <sup>c</sup> DMP/DCM/15<sup>o</sup>C/3h, <sup>d</sup> NaHSO<sub>3</sub>/EtOAc/EtOH/50<sup>o</sup>C/3h

## Synthesis of compounds *1c/d-17c/d*

### General information

Reagents and dry solvents were purchased from various chemical suppliers (Sigma-Aldrich, Acros Organics, Chem-Impex, TCI America, Oakwood chemical, Cambridge Isotopes, Alpha Aesar and Fisher) and were used as obtained. Silica gel (230-450 mesh) used for flash chromatography was purchased from Sorbent Technologies (Atlanta, GA). Normal phase chromatography was performed on a Teledyne ISCO CombiFlash system using RediSep normal phase silica cartridges (35-70  $\mu\text{m}$  particle size range). Thin layer chromatography was performed using Analtech silica gel plates. Visualization was accomplished using UV light and/or iodine. NMR spectra were recorded in  $\text{CDCl}_3$  or  $\text{DMSO-d}_6$  using Varian XL-400 spectrometer. The purity of the final compounds was found to be  $\geq 95\%$ , as determined by absolute qNMR analysis using a Bruker AV III 500 NMR spectrometer equipped with a CPDUL CRYOprobe and CASE autosampler (the University of Kansas Nuclear Magnetic Resonance Laboratory). Dimethyl sulfone *TraceCERT*<sup>®</sup> was used as the internal calibrant. High resolution mass spectrometry (HRMS) was performed at the Wichita State University Mass Spectrometry lab using an Orbitrap Velos Pro mass spectrometer (ThermoFisher, Waltham, MA) equipped with an electrospray ion source.

### Synthesis of alcohol inputs *1-17*

**Preparation of  $\alpha,\beta$ -unsaturated alcohols for *1, 2, 5-14* (Scheme S1). General procedure.** Methyl iodide (5 eq) was added to a solution of  $\alpha,\beta$ -unsaturated carboxylic acid (1 eq) and cesium carbonate (1.5 eq) in anhydrous acetonitrile (54 ml/g  $\alpha,\beta$ -

unsaturated carboxylic acid), and refluxed for 2 h. The reaction mixture was cooled down to room temperature, filtered and concentrated *in vacuo*. The residue was dissolved in ethyl acetate (40 ml/g  $\alpha,\beta$ -unsaturated carboxylic acid) and washed with saturated aqueous  $\text{NaHCO}_3$  (2 x 20 mL/ g carboxylic acid), followed by brine (20 mL). The organic layers were combined and dried over anhydrous  $\text{Na}_2\text{SO}_4$ , filtered, and concentrated *in vacuo* to yield the  $\alpha, \beta$ -unsaturated methyl ester which was used in the next step.

$\alpha, \beta$ -unsaturated methyl ester (1 eq) in DCM (4 ml/g  $\alpha, \beta$ -unsaturated methyl ester) was cooled to  $-78\text{ }^\circ\text{C}$  and diisobutyl aluminum hydride in toluene (1M, 2 eq) was added, followed by stirring for 1 h at  $-78\text{ }^\circ\text{C}$ . The reaction mixture was neutralized by adding saturated ammonium chloride (2 ml/g  $\alpha,\beta$ -unsaturated ester). When the reaction mixture reached room temperature, the solid was filtered off and washed with DCM. The filtrate was washed with brine (20 mL/g ester) and dried over anhydrous  $\text{Na}_2\text{SO}_4$ , filtered and concentrated *in vacuo*. The resulting crude product was purified by flash chromatography (silica gel/ethyl acetate/hexane) to yield to yield the  $\alpha, \beta$ -unsaturated alcohol.

**Preparation of  $\alpha,\beta$ -unsaturated alcohols for 3, 4, 15-17 (Scheme S1). General procedure.** A solution of trimethyl phosphonoacetate (3 eq) in anhydrous DCM (40 ml/g trimethyl phosphonoacetate) was added dropwise to a solution of sodium hydride (90%, 2.5 eq) in anhydrous DCM (25 ml/g sodium hydride) and stirred for 0.5 h at room temperature. The appropriate aldehyde (1 eq) was added, and the reaction mixture was stirred overnight at room temperature. The reaction mixture was then cooled in ice and quenched by adding water dropwise. The organic layer was separated and washed with 5% aqueous hydrochloric acid (2 x 20 mL/g aldehyde), saturated aqueous  $\text{NaHCO}_3$  (2 x 20 mL), followed by brine (20 mL). The organic layer was dried over anhydrous  $\text{Na}_2\text{SO}_4$ ,

filtered and concentrated *in vacuo*. The crude product was purified by flash chromatography to yield the  $\alpha$ ,  $\beta$ -unsaturated ester.

$\alpha$ ,  $\beta$ -unsaturated ester (1 eq) in DCM (4 ml/g  $\alpha$ ,  $\beta$ -unsaturated methyl ester) was cooled to  $-78\text{ }^{\circ}\text{C}$  and diisobutyl aluminum hydride in toluene (1M, 2 eq) was added, followed by stirring for 1 h at  $-78\text{ }^{\circ}\text{C}$ . The reaction mixture was neutralized by adding saturated ammonium chloride (2 ml/g ester). When the temperature of the solution reached room temperature, the solid was filtered off, washed with DCM, and the combined filtrates were washed with brine (20 mL/g ester) and dried over anhydrous  $\text{Na}_2\text{SO}_4$ , filtered and concentrated *in vacuo*. The resulting crude product was purified by flash chromatography (silica gel/ethyl acetate/hexane) to yield the  $\alpha$ ,  $\beta$ -unsaturated alcohol.

**General procedure for making cyclopropane alcohols (Simmons-Smith reaction).** A solution of  $\text{Et}_2\text{Zn}$  in hexane (1M, 2 eq) and anhydrous dichloromethane (mL) were mixed and cooled to  $0\text{-}5\text{ }^{\circ}\text{C}$ .  $\text{CH}_2\text{I}_2$  (or  $\text{CD}_2\text{I}_2$ ) (4 eq) was added dropwise and stirred for 10 min, whereupon a white precipitate formed. **Caution!** The reaction was found to react violently upon addition of  $\text{CH}_2\text{I}_2$  producing a higher pressure inside the round bottom flask. A solution of the  $\alpha$ ,  $\beta$ -unsaturated alcohol in DCM (20 ml/g alcohol) was added dropwise at  $0\text{-}5\text{ }^{\circ}\text{C}$  into above precipitate and the reaction mixture was stirred at RT overnight. The reaction mixture was quenched by adding saturated ammonium chloride (10 ml/g alcohol). The organic layer was separated. The aqueous layer was extracted with DCM (20 mL/g alcohol) and the combined organic layer was washed with brine (20 mL/g alcohol) and dried over anhydrous  $\text{Na}_2\text{SO}_4$ , filtered and concentrated *in vacuo*. The resulting crude product was purified by flash chromatography (silica gel/ethyl acetate/hexane) to yield cyclopropane alcohols **1,3, 5-17**.



**General procedure for making *gem*-difluorocyclopropane alcohols 2 and 4.** To a solution of  $\alpha$ ,  $\beta$ -unsaturated alcohol (1 eq) in anhydrous DCM (2 ml/g  $\alpha$ , $\beta$ -unsaturated alcohol) was added TEA (1 eq) and acetic anhydride (1 eq), followed by 4-dimethylamino pyridine (4-DMAP) portion-wise and stirred overnight at room temperature. The reaction mixture was quenched by adding water dropwise. The organic layer was separated and washed with 5% aqueous hydrochloric acid (2 x 20 mL/g aldehyde), saturated aqueous NaHCO<sub>3</sub> (2 x 20 mL), followed by brine (20 mL). The organic layer was dried over anhydrous Na<sub>2</sub>SO<sub>4</sub>, filtered and concentrated *in vacuo* to yield the  $\alpha$ ,  $\beta$ -unsaturated acetate ester.

Sodium fluoride (0.012 eq),  $\alpha$ ,  $\beta$ -unsaturated acetate ester (1 eq) and anhydrous toluene (1 eq) were added into a dry round bottom flask and heated up to 130±5 °C in an oil bath. Trimethylsilyl-2,2-difluoro-2-(fluorosulfonyl) acetate (1 eq) was added dropwise over 2h while heating. The reaction mixture was refluxed for 2 h and then cooled down to room temperature and concentrated *in vacuo*. The residue was dissolved in ethyl acetate (40 ml/g  $\alpha$ ,  $\beta$ -unsaturated acetate ester) and washed with brine (20 mL/g  $\alpha$ ,  $\beta$ -unsaturated acetate ester). The organic layer was dried over anhydrous Na<sub>2</sub>SO<sub>4</sub>, filtered and concentrated *in vacuo*. The crude product was purified by flash chromatography (silica gel/ethyl acetate/hexane) to yield the *gem*-difluorocyclopropane acetate ester.

Lithium hydroxide (4 eq) was added to a solution of *gem*-difluorocyclopropane acetate ester (1 eq) in THF (7 ml/g ester) and stirred at room temperature for 3 h. The reaction mixture was acidified using 5% hydrochloric acid and extracted into ethyl acetate. The organic layer was dried over anhydrous Na<sub>2</sub>SO<sub>4</sub>, filtered and concentrated *in vacuo*. The

crude product was purified by flash chromatography to yield *the gem*-difluorocyclopropane acetate ester.

### Synthesis of compounds **1c/d-17c/d**

**Preparation of compounds 1b-17b (Scheme S2). General procedure.** To a solution of alcohol (1 eq) (Fig 2) in anhydrous acetonitrile (10 mL/g alcohol) was added N, N'-disuccinimidyl carbonate (1.2 eq) and TEA (3.0 eq) and the reaction mixture was stirred for 4h at room temperature. The solvent was removed *in vacuo* and the residue was dissolved in ethyl acetate (40 mL/g alcohol). The organic phase was washed with saturated aqueous NaHCO<sub>3</sub> (2 x 20 mL/ g alcohol), followed by brine (20 mL). The organic layers were combined and dried over anhydrous Na<sub>2</sub>SO<sub>4</sub>, filtered and concentrated *in vacuo* to yield the mixed carbonate which was used in the next step without further purification.

To a solution of Leu-Gln surrogate amino alcohol **a** (1.0 eq) in dry methylene chloride (10 mL/g of amino alcohol) was added TEA (1.5 eq) and the reaction mixture was stirred for 20 min at room temperature (solution 1). In a separate flask, the mixed carbonate was dissolved in dry methylene chloride (10 mL/g of carbonate) (solution 2). Solution 1 was added to solution 2 and the reaction mixture was stirred 3h at room temperature. Methylene chloride was added to the organic phase (40 mL/g of carbonate) and then washed with saturated aqueous NaHCO<sub>3</sub> (2 x 20 mL/ g alcohol), followed by brine (20 mL). The organic phase was dried over anhydrous Na<sub>2</sub>SO<sub>4</sub>, filtered and concentrated *in vacuo*. The resultant crude product was purified by flash chromatography (silica gel/hexane/ethyl acetate) to yield dipeptidyl alcohol **b** as a white solid.

**Preparation of compounds 1c-17c (Scheme S2). General procedure.** To a solution of dipeptidyl alcohol **b** (1 eq) in anhydrous dichloromethane (300 mL/g dipeptidyl alcohol) kept at 0-5 °C under a N<sub>2</sub> atmosphere was added Dess-Martin periodinane reagent (3.0 eq) and the reaction mixture was stirred for 3 h at 15-20 °C. The organic phase was washed with 10% aq Na<sub>2</sub>S<sub>2</sub>O<sub>3</sub> (2 x 100 mL/g dipeptidyl alcohol), followed by saturated aqueous NaHCO<sub>3</sub> (2 x 100 mL/ g dipeptidyl alcohol), distilled water (2 x 100 mL/ g dipeptidyl alcohol), and brine (100 mL). The organic phase was dried over anhydrous Na<sub>2</sub>SO<sub>4</sub>, filtered and concentrated *in vacuo*. The resulting crude product was purified by flash chromatography (silica gel/hexane/ethyl acetate) to yield aldehyde **c** as a white solid.

**Preparation of compounds 1-17d (Scheme S2). General procedure.** To a solution of dipeptidyl aldehyde **c** (1 eq) in ethyl acetate (10 mL/g of dipeptidyl aldehyde) was added absolute ethanol (5 mL/g of dipeptidyl aldehyde) with stirring, followed by a solution of sodium bisulfite (1 eq) in water (1 mL/ g of dipeptidyl aldehyde). The reaction mixture was stirred for 3 h at 50 °C. The reaction mixture was allowed to cool to room temperature and then vacuum filtered. The solid was thoroughly washed with absolute ethanol and the filtrate was dried over anhydrous sodium sulfate, filtered, and concentrated to yield a white solid. The white solid was stirred with dry ethyl ether (3 x 10 mL/ g of dipeptidyl aldehyde), followed by careful removal of the solvent using a pipette and dried using a vacuum pump for 2 h to yield dipeptidyl bisulfite adduct **d** as a white solid.

## Characterization of compounds **1c/d-17c/d**

((1S,2S)-2-phenylcyclopropyl) methyl ((S)-4-methyl-1-oxo-1-(((S)-1-oxo-3-((S)-2-oxopyrrolidin-3-yl)propan-2-yl)amino)pentan-2-yl)carbamate (**1c**). <sup>1</sup>H NMR (400 MHz, dmsO) δ 9.39 (dd, J = 6.3, 3.0 Hz, 1H), 8.46 (dd, J = 18.2, 7.4 Hz, 1H), 7.71 – 7.32 (m, 2H), 7.23 (t, J = 7.5 Hz, 2H), 7.18 – 7.10 (m, 1H), 7.07 (d, J = 7.5 Hz, 2H), 4.73 – 4.11 (m, 1H), 4.10 – 3.72 (m, 3H), 3.29 – 2.98 (m, 2H), 2.36 – 2.05 (m, 2H), 1.95 – 1.71 (m, 2H), 1.71 – 1.30 (m, 6H), 0.95 (d, J = 6.2 Hz, 2H), 0.91 – 0.78 (m, 6H). HRMS m/z: [M+Na]<sup>+</sup> Calculated for C<sub>24</sub>H<sub>33</sub>N<sub>3</sub>NaO<sub>5</sub> 466.2318; Found 466.2297.

((1R,3R)-2,2-difluoro-3-phenylcyclopropyl) methyl ((S)-4-methyl-1-oxo-1-(((S)-1-oxo-3-((S)-2-oxopyrrolidin-3-yl)propan-2-yl)amino)pentan-2-yl)carbamate (**2c**). Yield (90%). <sup>1</sup>H NMR (400 MHz, cdCl<sub>3</sub>) δ 9.47 (s, 1H), 8.49 (dd, J = 15.0, 5.5 Hz, 1H), 7.38 – 7.15 (m, 5H), 5.98 (d, J = 13.7 Hz, 1H), 5.41 – 5.31 (m, 1H), 4.44 – 4.16 (m, 4H), 3.42 – 3.25 (m, 2H), 2.75 – 2.63 (m, 1H), 2.54 – 2.19 (m, 3H), 2.00 – 1.84 (m, 2H), 1.82 – 1.46 (m, 4H), 1.03 – 0.82 (m, 6H). HRMS m/z: [M+Na]<sup>+</sup> Calculated for C<sub>24</sub>H<sub>31</sub>F<sub>2</sub>N<sub>3</sub>NaO<sub>5</sub> 686.2829; Found 686.2793.

((1S,2R)-2-benzylcyclopropyl) methyl ((S)-4-methyl-1-oxo-1-(((S)-1-oxo-3-((S)-2-oxopyrrolidin-3-yl)propan-2-yl)amino)pentan-2-yl)carbamate (**3c**). Yield (75%). <sup>1</sup>H NMR (400 MHz, cdCl<sub>3</sub>) δ 9.53 (d, J = 33.7 Hz, 1H), 8.48 – 8.22 (m, 1H), 7.42 – 7.27 (m, 2H), 7.26 – 7.15 (m, 3H), 6.20 – 5.98 (m, 1H), 5.32 – 5.12 (m, 1H), 4.62 – 4.23 (m, 2H), 4.23 – 3.79 (m, 2H), 3.43 – 3.23 (m, 2H), 2.72 – 2.26 (m, 3H), 2.14 – 1.77 (m, 3H), 1.76 – 1.61 (m, 3H), 1.59 – 1.46 (m, 1H), 1.35 – 1.16 (m, 1H), 1.15 – 0.78 (m, 8H), 0.59 – 0.46 (m, 1H). HRMS m/z: [M+Na]<sup>+</sup> Calculated for C<sub>25</sub>H<sub>35</sub>N<sub>3</sub>NaO<sub>5</sub> 480.2475; Found 480.2476.

((1S,3R)-3-benzyl-2,2-difluorocyclopropyl) methyl ((S)-4-methyl-1-oxo-1-(((S)-1-oxo-3-((S)-2-oxopyrrolidin-3-yl)propan-2-yl)amino)pentan-2-yl)carbamate (**4c**). Yield (46%). <sup>1</sup>H NMR (400 MHz, cdcl<sub>3</sub>) δ 9.53 (d, J = 38.5 Hz, 1H), 8.52 – 8.37 (m, 1H), 7.45 – 7.06 (m, 5H), 5.92 – 5.68 (m, 1H), 5.28 – 5.12 (m, 1H), 4.44 – 3.95 (m, 4H), 3.43 – 3.21 (m, 2H), 2.90 – 2.72 (m, 1H), 2.53 – 2.27 (m, 2H), 2.19 – 1.80 (m, 3H), 1.78 – 1.42 (m, 6H), 1.00 – 0.86 (m, 6H). HRMS m/z: [M+Na]<sup>+</sup> Calculated for C<sub>25</sub>H<sub>33</sub>F<sub>2</sub>N<sub>3</sub>NaO<sub>5</sub> 516.2286; Found 516.2269.

((1S,2S)-2-(3-fluorophenyl) cyclopropyl)methyl ((S)-4-methyl-1-oxo-1-(((S)-1-oxo-3-((S)-2-oxopyrrolidin-3-yl)propan-2-yl)amino)pentan-2-yl)carbamate (**5c**). Yield (82%). <sup>1</sup>H NMR (400 MHz, dmso) δ 9.40 (d, J = 2.8 Hz, 1H), 8.44 (d, J = 7.5 Hz, 1H), 7.63 (s, 1H), 7.37 (d, J = 8.0 Hz, 1H), 7.30 – 7.22 (m, 1H), 6.99 – 6.85 (m, 3H), 4.28 – 4.09 (m, 1H), 4.08 – 3.96 (m, 2H), 3.94 – 3.80 (m, 1H), 3.20 – 3.03 (m, 2H), 2.35 – 2.23 (m, 1H), 2.19 – 2.06 (m, 1H), 2.01 – 1.83 (m, 2H), 1.70 – 1.54 (m, 3H), 1.53 – 1.33 (m, 3H), 1.04 – 0.95 (m, 2H), 0.93 – 0.77 (m, 6H). HRMS m/z: [M+Na]<sup>+</sup> Calculated for C<sub>24</sub>H<sub>32</sub>FN<sub>3</sub>NaO<sub>5</sub> 484.2224; Found 484.2216.

((1S,2S)-2-(3-chlorophenyl) cyclopropyl)methyl ((S)-4-methyl-1-oxo-1-(((S)-1-oxo-3-((S)-2-oxopyrrolidin-3-yl)propan-2-yl)amino)pentan-2-yl)carbamate (**6c**). Yield (90%). <sup>1</sup>H NMR (400 MHz, dmso) δ 9.40 (d, J = 2.6 Hz, 1H), 8.44 (d, J = 7.6 Hz, 1H), 7.63 (s, 1H), 7.37 (d, J = 8.0 Hz, 1H), 7.29 – 7.17 (m, 2H), 7.15 – 7.12 (m, 1H), 7.07 – 7.01 (m, 1H), 4.23 – 4.13 (m, 1H), 4.09 – 3.97 (m, 2H), 3.93 – 3.79 (m, 1H), 3.20 – 3.03 (m, 2H), 2.35 – 2.21 (m, 1H), 2.20 – 2.08 (m, 1H), 2.01 – 1.84 (m, 2H), 1.68 – 1.56 (m, 3H), 1.53 – 1.34 (m, 3H), 1.06 – 0.95 (m, 2H), 0.91 – 0.79 (m, 6H). HRMS m/z: [M+Na]<sup>+</sup> Calculated for C<sub>24</sub>H<sub>32</sub>ClN<sub>3</sub>NaO<sub>5</sub> 500.1928; Found 500.1932.

((1S,2S)-2-(4-fluorophenyl)cyclopropyl)methyl ((S)-4-methyl-1-oxo-1-(((S)-1-oxo-3-((S)-2-oxopyrrolidin-3-yl)propan-2-yl)amino)pentan-2-yl)carbamate (**7c**). Yield (86%). <sup>1</sup>H NMR (400 MHz, dmsO) δ 9.40 (d, J = 2.8 Hz, 1H), 8.44 (d, J = 7.5 Hz, 1H), 7.63 (s, 1H), 7.37 (d, J = 8.0 Hz, 1H), 7.15 – 7.01 (m, 4H), 4.23 – 4.14 (m, 1H), 4.09 – 3.94 (m, 2H), 3.93 – 3.82 (m, 1H), 3.20 – 3.03 (m, 2H), 2.35 – 2.20 (m, 1H), 2.18 – 2.08 (m, 1H), 1.96 – 1.82 (m, 2H), 1.70 – 1.53 (m, 3H), 1.51 – 1.29 (m, 3H), 0.98 – 0.79 (m, 8H). HRMS m/z: [M+Na]<sup>+</sup> Calculated for C<sub>24</sub>H<sub>32</sub>FN<sub>3</sub>NaO<sub>5</sub> 484.2224; Found 484.2224.

((1S,2S)-2-(4-chlorophenyl)cyclopropyl)methyl ((S)-4-methyl-1-oxo-1-(((S)-1-oxo-3-((S)-2-oxopyrrolidin-3-yl)propan-2-yl)amino)pentan-2-yl)carbamate (**8c**). Yield (81%). <sup>1</sup>H NMR (400 MHz, dmsO) δ 9.40 (d, J = 2.7 Hz, 1H), 8.44 (d, J = 7.5 Hz, 1H), 7.63 (s, 1H), 7.37 (d, J = 8.0 Hz, 1H), 7.28 (d, J = 8.4 Hz, 2H), 7.10 (d, J = 8.3 Hz, 2H), 4.26 – 4.12 (m, 1H), 4.11 – 3.96 (m, 2H), 3.93 – 3.82 (m, 1H), 3.22 – 3.03 (m, 2H), 2.37 – 2.21 (m, 1H), 2.19 – 2.04 (m, 1H), 2.01 – 1.83 (m, 2H), 1.63 (s, 3H), 1.52 – 1.35 (m, 3H), 1.05 – 0.92 (m, 2H), 0.89 – 0.78 (m, 6H). HRMS m/z: [M+Na]<sup>+</sup> Calculated for C<sub>24</sub>H<sub>32</sub>ClN<sub>3</sub>NaO<sub>5</sub> 500.1928; Found 500.1927.

((1S,2S)-2-(3-methoxyphenyl)cyclopropyl)methyl ((S)-4-methyl-1-oxo-1-(((S)-1-oxo-3-((S)-2-oxopyrrolidin-3-yl)propan-2-yl)amino)pentan-2-yl)carbamate (**9c**). Yield (91%). <sup>1</sup>H NMR (400 MHz, dmsO) δ 9.40 (s, 1H), 8.44 (d, J = 7.5 Hz, 1H), 7.63 (s, 1H), 7.36 (d, J = 8.0 Hz, 1H), 7.14 (t, J = 7.9 Hz, 1H), 6.70 (d, J = 8.2 Hz, 1H), 6.66 – 6.57 (m, 2H), 4.24 – 4.10 (m, 1H), 4.11 – 3.95 (m, 2H), 3.94 – 3.80 (m, 1H), 3.72 (s, 3H), 3.20 – 3.03 (m, 2H), 2.35 – 2.08 (m, 2H), 1.96 – 1.80 (m, 2H), 1.74 – 1.54 (m, 3H), 1.54 – 1.28 (m, 3H), 1.03 – 0.76 (m, 8H). HRMS m/z: [M+Na]<sup>+</sup> Calculated for C<sub>25</sub>H<sub>35</sub>N<sub>3</sub>NaO<sub>6</sub> 496.2424; Found 496.2404.

((1S,2S)-2-(4-methoxyphenyl)cyclopropyl)methyl ((S)-4-methyl-1-oxo-1-(((S)-1-oxo-3-((S)-2-oxopyrrolidin-3-yl)propan-2-yl)amino)pentan-2-yl)carbamate (**10c**). Yield (88%).  
1H NMR (400 MHz, dmsO)  $\delta$  9.40 (d, J = 3.0 Hz, 1H), 8.45 (d, J = 7.5 Hz, 1H), 7.64 (s, 1H), 7.37 (d, J = 8.0 Hz, 1H), 7.00 (d, J = 7.3 Hz, 2H), 6.81 (d, J = 6.9 Hz, 1H), 4.26 – 4.13 (m, 1H), 4.12 – 3.93 (m, 2H), 3.93 – 3.82 (m, 1H), 3.71 (s, 3H), 3.22 – 3.02 (m, 2H), 2.37 – 2.20 (m, 1H), 2.20 – 2.08 (m, 1H), 1.98 – 1.79 (m, 2H), 1.72 – 1.55 (m, 3H), 1.54 – 1.38 (m, 2H), 1.37 – 1.22 (m, 1H), 0.97 – 0.74 (m, 8H). HRMS m/z: [M+Na]<sup>+</sup> Calculated for C<sub>25</sub>H<sub>35</sub>N<sub>3</sub>NaO<sub>6</sub> 496.2424; Found 496.2398.

((1S,2S)-2-(2-methoxyphenyl)cyclopropyl)methyl ((S)-4-methyl-1-oxo-1-(((S)-1-oxo-3-((S)-2-oxopyrrolidin-3-yl)propan-2-yl)amino)pentan-2-yl)carbamate (**11c**). Yield (72%).  
1H NMR (400 MHz, dmsO)  $\delta$  9.39 (s, 1H), 8.44 (d, J = 7.5 Hz, 1H), 7.63 (s, 1H), 7.35 (d, J = 7.8 Hz, 1H), 7.17 – 7.08 (m, 1H), 6.92 (d, J = 8.1 Hz, 1H), 6.83 (d, J = 5.1 Hz, 2H), 4.31 – 4.12 (m, 1H), 4.11 – 4.01 (m, 1H), 4.00 – 3.88 (m, 2H), 3.79 (s, 3H), 3.19 – 3.01 (m, 2H), 2.35 – 2.21 (m, 1H), 2.18 – 2.01 (m, 2H), 1.96 – 1.81 (m, 1H), 1.72 – 1.54 (m, 3H), 1.52 – 1.31 (m, 3H), 0.96 – 0.73 (m, 8H). HRMS m/z: [M+Na]<sup>+</sup> Calculated for C<sub>25</sub>H<sub>35</sub>N<sub>3</sub>NaO<sub>6</sub> 496.2424; Found 496.2404.

((1R,2S)-2-(2-methoxyphenyl)cyclopropyl)methyl ((S)-4-methyl-1-oxo-1-(((S)-1-oxo-3-((S)-2-oxopyrrolidin-3-yl)propan-2-yl)amino)pentan-2-yl)carbamate (**12c**). Yield (87%).  
1H NMR (400 MHz, dmsO)  $\delta$  9.38 (d, J = 1.7 Hz, 1H), 8.38 (d, J = 7.6 Hz, 1H), 7.63 (s, 1H), 7.25 – 7.13 (m, 2H), 7.07 (t, J = 6.9 Hz, 1H), 6.94 (d, J = 8.1 Hz, 1H), 6.86 (t, J = 7.0 Hz, 1H), 4.23 – 4.10 (m, 1H), 4.03 – 3.91 (m, 1H), 3.80 (s, 3H), 3.77 – 3.67 (m, 1H), 3.32 – 3.24 (m, 1H), 3.21 – 3.00 (m, 2H), 2.34 – 2.03 (m, 3H), 1.95 – 1.80 (m, 1H), 1.70 – 1.53

(m, 3H), 1.52 – 1.34 (m, 3H), 1.04 – 0.78 (m, 8H). HRMS m/z: [M+Na]<sup>+</sup> Calculated for C<sub>25</sub>H<sub>35</sub>N<sub>3</sub>NaO<sub>6</sub> 496.2424; Found 496.2406.

((1S,2S)-2-propylcyclopropyl)methyl ((S)-4-methyl-1-oxo-1-(((S)-1-oxo-3-((S)-2-oxopyrrolidin-3-yl)propan-2-yl)amino)pentan-2-yl)carbamate (**13c**). Yield (56%). <sup>1</sup>H NMR (400 MHz, dmsO) δ 9.40 (d, J = 1.0 Hz, 1H), 8.42 (d, J = 7.6 Hz, 1H), 7.63 (s, 1H), 7.28 (d, J = 8.1 Hz, 1H), 4.23 – 4.12 (m, 1H), 4.09 – 3.96 (m, 1H), 3.88 – 3.65 (m, 2H), 3.21 – 3.04 (m, 2H), 2.32 – 2.19 (m, 1H), 2.19 – 2.06 (m, 1H), 1.95 – 1.83 (m, 1H), 1.70 – 1.59 (m, 2H), 1.53 – 1.38 (m, 2H), 1.34 (p, J = 7.3 Hz, 2H), 1.26 – 1.10 (m, 2H), 0.88 (td, J = 7.0, 4.3 Hz, 11H), 0.72 – 0.59 (m, 1H), 0.44 – 0.34 (m, 1H), 0.33 – 0.21 (m, 1H). HRMS m/z: [M+Na]<sup>+</sup> Calculated for C<sub>21</sub>H<sub>36</sub>N<sub>3</sub>O<sub>5</sub> 410.2655; Found 410.2636.

((1R,2S)-2-propylcyclopropyl)methyl ((S)-4-methyl-1-oxo-1-(((S)-1-oxo-3-((S)-2-oxopyrrolidin-3-yl)propan-2-yl)amino)pentan-2-yl)carbamate (**14c**). Yield (83%). <sup>1</sup>H NMR (400 MHz, cdcl<sub>3</sub>) δ 9.54 (d, J = 28.9 Hz, 1H), 8.27 (d, J = 6.2 Hz, 1H), 6.41 (d, J = 41.1 Hz, 1H), 5.42 – 5.22 (m, 1H), 4.57 – 4.05 (m, 3H), 4.03 – 3.90 (m, 1H), 3.43 – 3.25 (m, 2H), 2.55 – 2.39 (m, 1H), 2.14 – 1.84 (m, 3H), 1.80 – 1.33 (m, 7H), 1.26 – 1.08 (m, 2H), 0.98 – 0.85 (m, 10H), 0.77 – 0.67 (m, 1H), 0.07 – -0.01 (m, 1H). HRMS m/z: [M+Na]<sup>+</sup> Calculated for C<sub>21</sub>H<sub>35</sub>N<sub>3</sub>NaO<sub>5</sub> 432.2475; Found 432.2474.

((1R,2S)-2-cyclohexylcyclopropyl)methyl ((S)-4-methyl-1-oxo-1-(((S)-1-oxo-3-((S)-2-oxopyrrolidin-3-yl)propan-2-yl)amino)pentan-2-yl)carbamate (**15c**). Yield (93%). <sup>1</sup>H NMR (400 MHz, cdcl<sub>3</sub>) δ 9.50 (s, 1H), 8.28 (t, J = 6.3 Hz, 1H), 6.15 (s, 1H), 5.24 (d, J = 8.9 Hz, 1H), 4.41 – 4.23 (m, 2H), 4.12 – 3.70 (m, 2H), 3.41 – 3.30 (m, 2H), 2.52 – 2.35 (m, 2H), 2.07 – 1.81 (m, 3H), 1.77 – 1.52 (m, 8H), 1.19 – 0.83 (m, 12H), 0.61 – 0.44 (m, 2H), 0.43



– 0.31 (m, 2H). HRMS m/z: [M+Na]<sup>+</sup> Calculated for C<sub>24</sub>H<sub>39</sub>N<sub>3</sub>NaO<sub>5</sub> 472.2788; Found 472.2780.

((1S,2S)-2-(cyclohexylmethyl)cyclopropyl)methyl ((S)-4-methyl-1-oxo-1-(((S)-1-oxo-3-((S)-2-oxopyrrolidin-3-yl)propan-2-yl)amino)pentan-2-yl)carbamate (**16c**). Yield (91%).  
1H NMR (400 MHz, cdcl<sub>3</sub>) δ 9.50 (s, 1H), 8.32 – 8.20 (m, 1H), 6.30 (s, 1H), 5.27 (d, J = 8.8 Hz, 1H), 4.42 – 4.05 (m, 2H), 4.04 – 3.68 (m, 2H), 3.42 – 3.30 (m, 2H), 2.54 – 2.35 (m, 1H), 2.05 – 1.82 (m, 2H), 1.78 – 1.45 (m, 9H), 1.37 – 1.09 (m, 6H), 0.99 – 0.78 (m, 10H), 0.72 – 0.61 (m, 1H), 0.47 – 0.38 (m, 1H), 0.34 – 0.25 (m, 1H). HRMS m/z: [M+Na]<sup>+</sup> Calculated for C<sub>25</sub>H<sub>41</sub>N<sub>3</sub>NaO<sub>5</sub> 486.2944; Found 486.2905.

((1S,2R)-2-(4,4-difluorocyclohexyl)cyclopropyl)methyl ((S)-4-methyl-1-oxo-1-(((S)-1-oxo-3-((S)-2-oxopyrrolidin-3-yl)propan-2-yl)amino)pentan-2-yl)carbamate (**17c**). Yield (88%).  
1H NMR (400 MHz, cdcl<sub>3</sub>) δ 9.49 (s, 1H), 8.42 – 8.30 (m, 1H), 6.01 (s, 1H), 5.27 – 5.17 (m, 1H), 4.37 – 4.27 (m, 1H), 4.07 – 3.68 (m, 1H), 3.43 – 3.32 (m, 2H), 2.51 – 2.38 (m, 1H), 2.12 – 1.35 (m, 16H), 0.98 (d, J = 5.8 Hz, 8H), 0.73 – 0.52 (m, 2H), 0.52 – 0.36 (m, 2H). HRMS m/z: [M+Na]<sup>+</sup> Calculated for C<sub>24</sub>H<sub>38</sub>F<sub>2</sub>N<sub>3</sub>O<sub>5</sub> 486.2779; Found 486.2926.

sodium (2S)-1-hydroxy-2-(((S)-4-methyl-2-((((1S,2S)-2-phenylcyclopropyl)methoxy)carbonyl)amino)pentanamido)-3-((S)-2-oxopyrrolidin-3-yl)propane-1-sulfonate (**1d**).  
1H NMR (400 MHz, dmsO) δ 8.45 – 8.40 (m, 1H), 7.66 – 7.59 (m, 1H), 7.24 (t, J = 7.5 Hz, 3H), 7.17 – 7.09 (m, 1H), 7.09 – 7.00 (m, 2H), 5.15 – 4.80 (m, 1H), 4.06 – 3.70 (m, 2H), 3.10 – 3.00 (m, 3H), 2.38 – 1.82 (m, 5H), 1.82 – 1.34 (m, 6H), 0.99 – 0.92 (m, 2H), 0.92 – 0.79 (m, 6H). HRMS m/z: [M+Na]<sup>+</sup> Calculated for C<sub>24</sub>H<sub>34</sub>N<sub>3</sub>Na<sub>2</sub>O<sub>8</sub>S 570.1862; Found 570.1841.

sodium (2S)-2-((S)-2-((((1R,3R)-2,2-difluoro-3-phenylcyclopropyl)methoxy)carbonyl)amino)-4-methylpentanamido)-1-hydroxy-3-((S)-2-oxopyrrolidin-3-yl)propane-1-sulfonate (**2d**). Yield (88%). <sup>1</sup>H NMR (400 MHz, dmsO) δ 7.71 – 7.39 (m, 3H), 7.38 – 7.19 (m, 5H), 5.50 (dd, *J* = 19.3, 6.2 Hz, 1H), 4.50 – 4.19 (m, 2H), 4.16 – 3.82 (m, 2H), 3.21 – 2.92 (m, 2H), 2.30 – 1.69 (m, 4H), 1.67 – 1.50 (m, 3H), 1.50 – 1.30 (m, 3H), 0.90 – 0.74 (m, 6H). HRMS *m/z*: [M+Na]<sup>+</sup> Calculated for C<sub>24</sub>H<sub>32</sub>F<sub>2</sub>N<sub>3</sub>Na<sub>2</sub>O<sub>8</sub>S 768.2554; Found 768.3384.

sodium (2S)-2-((S)-2-((((1S,2R)-2-benzylcyclopropyl)methoxy)carbonyl)amino)-4-methylpentanamido)-1-hydroxy-3-((S)-2-oxopyrrolidin-3-yl)propane-1-sulfonate (**3d**). Yield (74%). <sup>1</sup>H NMR (400 MHz, dmsO) δ 7.69 – 7.42 (m, 3H), 7.38 – 7.13 (m, 5H), 5.67 – 5.35 (m, 1H), 4.30 – 3.64 (m, 4H), 3.20 – 2.93 (m, 2H), 2.70 – 2.55 (m, 1H), 2.50 – 2.39 (m, 1H), 2.31 – 2.06 (m, 3H), 2.06 – 1.70 (m, 1H), 1.70 – 1.52 (m, 2H), 1.49 – 1.31 (m, 2H), 1.08 – 0.94 (m, 2H), 0.91 – 0.75 (m, 6H), 0.52 – 0.41 (m, 2H). HRMS *m/z*: [M+Na]<sup>+</sup> Calculated for C<sub>25</sub>H<sub>36</sub>N<sub>3</sub>Na<sub>2</sub>O<sub>8</sub>S 584.2019; Found 584.2019.

sodium (2S)-2-((S)-2-((((1R,3S)-3-benzyl-2,2-difluorocyclopropyl)methoxy)carbonyl)amino)-4-methylpentanamido)-1-hydroxy-3-((S)-2-oxopyrrolidin-3-yl)propane-1-sulfonate (**4d**). Yield (73%). <sup>1</sup>H NMR (400 MHz, dmsO) δ 7.72 – 7.41 (m, 2H), 7.37 – 7.12 (m, 6H), 5.52 – 5.29 (m, 1H), 4.30 – 3.77 (m, 4H), 3.20 – 2.95 (m, 2H), 2.88 – 2.67 (m, 1H), 2.23 – 2.02 (m, 2H), 2.02 – 1.85 (m, 1H), 1.82 – 1.72 (m, 1H), 1.69 – 1.51 (m, 3H), 1.50 – 1.32 (m, 4H), 0.93 – 0.72 (m, 6H). HRMS *m/z*: [M+Na]<sup>+</sup> Calculated for C<sub>25</sub>H<sub>34</sub>F<sub>2</sub>N<sub>3</sub>Na<sub>2</sub>O<sub>8</sub>S 620.1830; Found 620.1810.

sodium (2S)-2-((S)-2-((((1S,2S)-2-(3-fluorophenyl)cyclopropyl)methoxy)carbonyl)amino)-4-methylpentanamido)-1-hydroxy-3-

((S)-2-oxopyrrolidin-3-yl)propane-1-sulfonate (**5d**). Yield (56%). <sup>1</sup>H NMR (400 MHz, dmsO) δ 7.68 – 7.43 (m, 2H), 7.43 – 7.31 (m, 1H), 7.28 – 7.22 (m, 1H), 6.98 – 6.86 (m, 3H), 5.54 – 5.31 (m, 1H), 4.07 – 3.77 (m, 4H), 3.20 – 2.95 (m, 2H), 2.23 – 2.04 (m, 2H), 2.02 – 1.84 (m, 2H), 1.70 – 1.50 (m, 3H), 1.50 – 1.33 (m, 3H), 1.05 – 0.94 (m, 2H), 0.90 – 0.74 (m, 6H). HRMS m/z: [M+Na]<sup>+</sup> Calculated for C<sub>24</sub>H<sub>33</sub>FN<sub>3</sub>Na<sub>2</sub>O<sub>8</sub>S 588.1768; Found 588.1774.

sodium (2S)-2-(((S)-2-((((1S,2S)-2-(3-chlorophenyl)cyclopropyl)methoxy)carbonyl)amino)-4-methylpentanamido)-1-hydroxy-3-((S)-2-oxopyrrolidin-3-yl)propane-1-sulfonate (**6d**). Yield (66%). <sup>1</sup>H NMR (400 MHz, dmsO) δ 7.65 – 7.42 (m, 2H), 7.40 – 7.31 (m, 1H), 7.26 (t, *J* = 7.8 Hz, 1H), 7.20 – 7.11 (m, 2H), 7.10 – 6.99 (m, 1H), 5.45 – 5.21 (m, 1H), 4.12 – 3.81 (m, 4H), 3.21 – 2.97 (m, 2H), 2.33 – 2.04 (m, 2H), 2.03 – 1.77 (m, 2H), 1.74 – 1.50 (m, 3H), 1.49 – 1.31 (m, 3H), 1.03 – 0.95 (m, 2H), 0.91 – 0.77 (m, 6H). HRMS m/z: [M+Na]<sup>+</sup> Calculated for C<sub>24</sub>H<sub>33</sub>ClN<sub>3</sub>Na<sub>2</sub>O<sub>8</sub>S 604.1473; Found 604.1477.

sodium (2S)-2-(((S)-2-((((1S,2S)-2-(4-fluorophenyl)cyclopropyl)methoxy)carbonyl)amino)-4-methylpentanamido)-1-hydroxy-3-((S)-2-oxopyrrolidin-3-yl)propane-1-sulfonate (**7d**). Yield (35%). <sup>1</sup>H NMR (400 MHz, dmsO) δ 7.65 – 7.43 (m, 2H), 7.36 (dd, *J* = 25.0, 7.9 Hz, 1H), 7.16 – 7.01 (m, 4H), 5.52 – 5.29 (m, 1H), 4.13 – 3.81 (m, 4H), 3.20 – 2.97 (m, 2H), 2.32 – 2.03 (m, 2H), 2.02 – 1.83 (m, 2H), 1.70 – 1.50 (m, 3H), 1.48 – 1.31 (m, 3H), 1.01 – 0.73 (m, 8H). HRMS m/z: [M+Na]<sup>+</sup> Calculated for C<sub>24</sub>H<sub>33</sub>FN<sub>3</sub>Na<sub>2</sub>O<sub>8</sub>S 588.1768; Found 588.1742.

sodium (2S)-2-(((S)-2-((((1S,2S)-2-(4-fluorophenyl)cyclopropyl)methoxy)carbonyl)amino)-4-methylpentanamido)-1-hydroxy-3-

((S)-2-oxopyrrolidin-3-yl)propane-1-sulfonate (**8d**). Yield (70%). <sup>1</sup>H NMR (400 MHz, dmsO) δ 7.64 – 7.50 (m, 2H), 7.48 – 7.38 (m, 1H), 7.28 (d, *J* = 8.4 Hz, 2H), 7.16 – 7.06 (m, 2H), 5.44 – 5.31 (m, 1H), 4.10 – 3.80 (m, 4H), 3.18 – 2.92 (m, 2H), 2.24 – 2.04 (m, 2H), 2.01 – 1.80 (m, 2H), 1.72 – 1.49 (m, 3H), 1.48 – 1.31 (m, 3H), 1.02 – 0.90 (m, 2H), 0.88 – 0.74 (m, 6H). HRMS *m/z*: [M+Na]<sup>+</sup> Calculated for C<sub>24</sub>H<sub>33</sub>FN<sub>3</sub>Na<sub>2</sub>O<sub>8</sub>S 604.1473; Found 604.1481.

sodium (2S)-1-hydroxy-2-(((S)-2-((((1S,2S)-2-(3-methoxyphenyl)cyclopropyl)methoxy)carbonyl)amino)-4-methylpentanamido)-3-((S)-2-oxopyrrolidin-3-yl)propane-1-sulfonate (**9d**). Yield (86 %). <sup>1</sup>H NMR (400 MHz, dmsO) δ 7.56 (dd, *J* = 19.6, 9.6 Hz, 1H), 7.45 (s, 1H), 7.34 (dd, *J* = 24.7, 8.3 Hz, 1H), 7.14 (t, *J* = 7.8 Hz, 1H), 6.73 – 6.61 (m, 3H), 5.45 – 5.25 (m, 1H), 4.13 – 3.80 (m, 4H), 3.72 (s, 3H), 3.21 – 2.95 (m, 2H), 2.26 – 2.03 (m, 2H), 2.01 – 1.84 (m, 2H), 1.70 – 1.50 (m, 3H), 1.49 – 1.33 (m, 3H), 1.00 – 0.92 (m, 2H), 0.89 – 0.77 (m, 6H). HRMS *m/z*: [M+Na]<sup>+</sup> Calculated for C<sub>24</sub>H<sub>33</sub>FN<sub>3</sub>Na<sub>2</sub>O<sub>8</sub>S 600.1968; Found 600.1939.

sodium (2S)-2-(((S)-2-((((1S,2S)-2-(4-fluorophenyl)cyclopropyl)methoxy)carbonyl)amino)-4-methylpentanamido)-1-hydroxy-3-((S)-2-oxopyrrolidin-3-yl)propane-1-sulfonate (**10d**). Yield (78%). <sup>1</sup>H NMR (400 MHz, dmsO) δ 7.68 – 7.13 (m, 3H), 7.05 – 6.97 (m, 2H), 6.85 – 6.77 (m, 2H), 5.52 – 5.22 (m, 1H), 4.13 – 3.80 (m, 4H), 3.70 (s, 3H), 3.18 – 2.97 (m, 2H), 2.28 – 2.05 (m, 2H), 2.03 – 1.72 (m, 2H), 1.68 – 1.52 (m, 3H), 1.50 – 1.38 (m, 3H), 1.37 – 1.21 (m, 2H), 0.96 – 0.74 (m, 6H). HRMS *m/z*: [M+Na]<sup>+</sup> Calculated for C<sub>24</sub>H<sub>33</sub>FN<sub>3</sub>Na<sub>2</sub>O<sub>8</sub>S 600.1968 ; Found 600.1958.

sodium (2S)-1-hydroxy-2-((S)-4-methyl-2-((((1S,2S)-2-(o-tolyl)cyclopropyl)methoxy)carbonyl)amino)pentanamido)-3-((S)-2-oxopyrrolidin-3-yl)propane-1-sulfonate (**11d**). Yield (83%). <sup>1</sup>H NMR (400 MHz, dmsO) δ 7.65 – 7.48 (m, 1H), 7.45 (s, 1H), 7.39 – 7.25 (m, 1H), 7.15 – 7.08 (m, 1H), 6.92 (d, *J* = 8.1 Hz, 1H), 6.86 – 6.79 (m, 2H), 5.47 – 5.28 (m, 1H), 4.07 – 3.86 (m, 4H), 3.79 (s, 3H), 3.19 – 2.96 (m, 2H), 2.33 – 1.84 (m, 4H), 1.71 – 1.51 (m, 3H), 1.47 – 1.27 (m, 3H), 0.98 – 0.72 (m, 8H). HRMS *m/z*: [M+Na]<sup>+</sup> Calculated for C<sub>25</sub>H<sub>36</sub>N<sub>3</sub>Na<sub>2</sub>O<sub>8</sub>S 600.1968; Found 600.1946.

sodium (2S)-1-hydroxy-2-((S)-2-((((1R,2S)-2-(2-methoxyphenyl)cyclopropyl)methoxy)carbonyl)amino)-4-methylpentanamido)-3-((S)-2-oxopyrrolidin-3-yl)propane-1-sulfonate (**12d**). Yield (72%). <sup>1</sup>H NMR (400 MHz, dmsO) δ 7.60 – 7.35 (m, 2H), 7.27 – 7.15 (m, 2H), 7.12 – 7.03 (m, 1H), 6.94 (d, *J* = 7.7 Hz, 1H), 6.85 (t, *J* = 7.4 Hz, 1H), 5.45 – 5.27 (m, 1H), 4.06 – 3.86 (m, 2H), 3.81 (s, 3H), 3.76 – 3.66 (m, 2H), 3.18 – 2.97 (m, 2H), 2.27 – 1.95 (m, 4H), 1.68 – 1.31 (m, 6H), 1.01 – 0.93 (m, 1H), 0.92 – 0.73 (m, 7H). HRMS *m/z*: [M+Na]<sup>+</sup> Calculated for C<sub>25</sub>H<sub>36</sub>N<sub>3</sub>Na<sub>2</sub>O<sub>9</sub>S 600.1968; Found 600.1941.

sodium (2S)-1-hydroxy-2-((S)-4-methyl-2-((((1S,2S)-2-propylcyclopropyl)methoxy)carbonyl)amino)pentanamido)-3-((S)-2-oxopyrrolidin-3-yl)propane-1-sulfonate (**13d**). Yield (83%). <sup>1</sup>H NMR (400 MHz, dmsO) δ 7.57 (d, *J* = 9.1 Hz, 1H), 7.53 – 7.43 (m, 1H), 7.24 (dd, *J* = 20.1, 8.0 Hz, 1H), 5.57 – 5.32 (m, 1H), 4.11 – 3.89 (m, 2H), 3.87 – 3.66 (m, 2H), 3.17 – 2.99 (m, 2H), 2.37 – 2.06 (m, 2H), 2.04 – 1.81 (m, 1H), 1.69 – 1.52 (m, 2H), 1.51 – 1.40 (m, 2H), 1.38 – 1.28 (m, 3H), 1.25 – 1.02 (m, 2H), 0.86 (dt, *J* = 11.3, 6.7 Hz, 10H), 0.71 – 0.57 (m, 1H), 0.44 – 0.34 (m, 1H), 0.31 –

0.22 (m, 1H). HRMS m/z: [M+Na]<sup>+</sup> Calculated for C<sub>21</sub>H<sub>36</sub>N<sub>3</sub>Na<sub>2</sub>O<sub>8</sub>S 536.2019; Found 536.1994.

sodium (2S)-1-hydroxy-2-(((S)-4-methyl-2-((((1R,2S)-2-propylcyclopropyl)methoxy)carbonyl)amino)pentanamido)-3-((S)-2-oxopyrrolidin-3-yl)propane-1-sulfonate (**14d**). Yield (49%). <sup>1</sup>H NMR (400 MHz, dmsO) δ 7.54 (dd, *J* = 16.6, 8.8 Hz, 1H), 7.47 – 7.44 (m, 1H), 7.33 – 7.22 (m, 1H), 5.55 – 5.31 (m, 1H), 4.10 – 3.80 (m, 4H), 3.22 – 2.99 (m, 2H), 2.32 – 2.07 (m, 2H), 2.05 – 1.84 (m, 1H), 1.74 – 1.51 (m, 3H), 1.50 – 1.30 (m, 5H), 1.28 – 1.16 (m, 1H), 1.14 – 1.00 (m, 1H), 0.93 – 0.76 (m, 10H), 0.70 – 0.59 (m, 1H), 0.07 – 0.01 (m, 1H). HRMS m/z: [M+Na]<sup>+</sup> Calculated for C<sub>21</sub>H<sub>36</sub>N<sub>3</sub>Na<sub>2</sub>O<sub>8</sub>S 536.2019; Found 536.2017.

sodium (2S)-2-(((S)-2-((((1R,2S)-2-cyclohexylcyclopropyl)methoxy)carbonyl)amino)-4-methylpentanamido)-1-hydroxy-3-((S)-2-oxopyrrolidin-3-yl)propane-1-sulfonate (**15d**). Yield (72%). <sup>1</sup>H NMR (400 MHz, dmsO) δ 7.67 – 7.56 (m, 1H), 7.53 – 7.44 (m, 1H), 7.27 – 7.10 (m, 1H), 5.47 (d, *J* = 53.4 Hz, 1H), 4.12 – 3.54 (m, 4H), 3.24 – 2.96 (m, 2H), 2.37 – 2.06 (m, 2H), 2.05 – 1.84 (m, 1H), 1.82 – 1.50 (m, 11H), 1.47 – 1.28 (m, 2H), 1.25 – 0.95 (m, 3H), 0.89 – 0.74 (m, 6H), 0.68 – 0.45 (m, 2H), 0.39 – 0.26 (m, 2H). HRMS m/z: [M+Na]<sup>+</sup> Calculated for C<sub>24</sub>H<sub>40</sub>N<sub>3</sub>Na<sub>2</sub>O<sub>8</sub>S 576.2332; Found 576.2311.

sodium (2S)-2-(((S)-2-((((1S,2S)-2-(cyclohexylmethyl)cyclopropyl)methoxy)carbonyl)amino)-4-methylpentanamido)-1-hydroxy-3-((S)-2-oxopyrrolidin-3-yl)propane-1-sulfonate (**16d**). Yield (48%). <sup>1</sup>H NMR (400 MHz, dmsO) δ 7.78 – 7.55 (m, 1H), 7.54 – 7.44 (m, 1H), 7.33 – 7.14 (m, 1H), 5.55 – 5.32 (m, 1H), 4.13 – 3.57 (m, 4H), 3.25 – 2.94 (m, 2H), 2.41 – 2.05 (m, 2H), 2.04 – 1.86 (m, 1H), 1.85 – 1.53 (m, 6H), 1.50 – 1.40 (m, 2H), 1.38 – 1.00 (m, 4H), 0.98 – 0.74 (m, 8H),

0.72 – 0.57 (m, 2H), 0.49 – 0.34 (m, 2H), 0.33 – 0.17 (m, 2H), 0.08 – 0.00 (m, 2H). HRMS m/z: [M+Na]<sup>+</sup> Calculated for C<sub>25</sub>H<sub>42</sub>N<sub>3</sub>Na<sub>2</sub>O<sub>8</sub>S 590.2488; Found 590.2433.

sodium

(2S)-2-((S)-2-((((1S,2R)-2-(4,4-

difluorocyclohexyl)cyclopropyl)methoxy)carbonyl)amino)-4-methylpentanamido)-1-

hydroxy-3-((S)-2-oxopyrrolidin-3-yl)propane-1-sulfonate (**17d**). Yield (58%). <sup>1</sup>H NMR (400

MHz, dmso) δ 7.72 – 7.40 (m, 2H), 7.36 – 7.16 (m, 1H), 5.33 (d, *J* = 47.5 Hz, 1H), 4.09 –

3.62 (m, 4H), 3.21 – 2.99 (m, 2H), 2.33 – 2.06 (m, 2H), 2.03 – 1.88 (m, 2H), 1.87 – 1.53

(m, 8H), 1.50 – 1.38 (m, 2H), 1.37 – 1.18 (m, 2H), 1.16 – 0.99 (m, 1H), 0.96 – 0.79 (m,

6H), 0.79 – 0.68 (m, 1H), 0.66 – 0.49 (m, 1H), 0.49 – 0.30 (m, 2H). HRMS m/z: [M+Na]<sup>+</sup>

Calculated for C<sub>24</sub>H<sub>38</sub>F<sub>2</sub>N<sub>3</sub>Na<sub>2</sub>O<sub>8</sub>S 612.2143; Found 612.2123.

### <sup>1</sup>H-NMR of compounds 1-17c/d

Peaks corresponding to residual solvents (H<sub>2</sub>O, DCM, DMSO, CHCl<sub>3</sub>) have not been integrated in below spectrums.

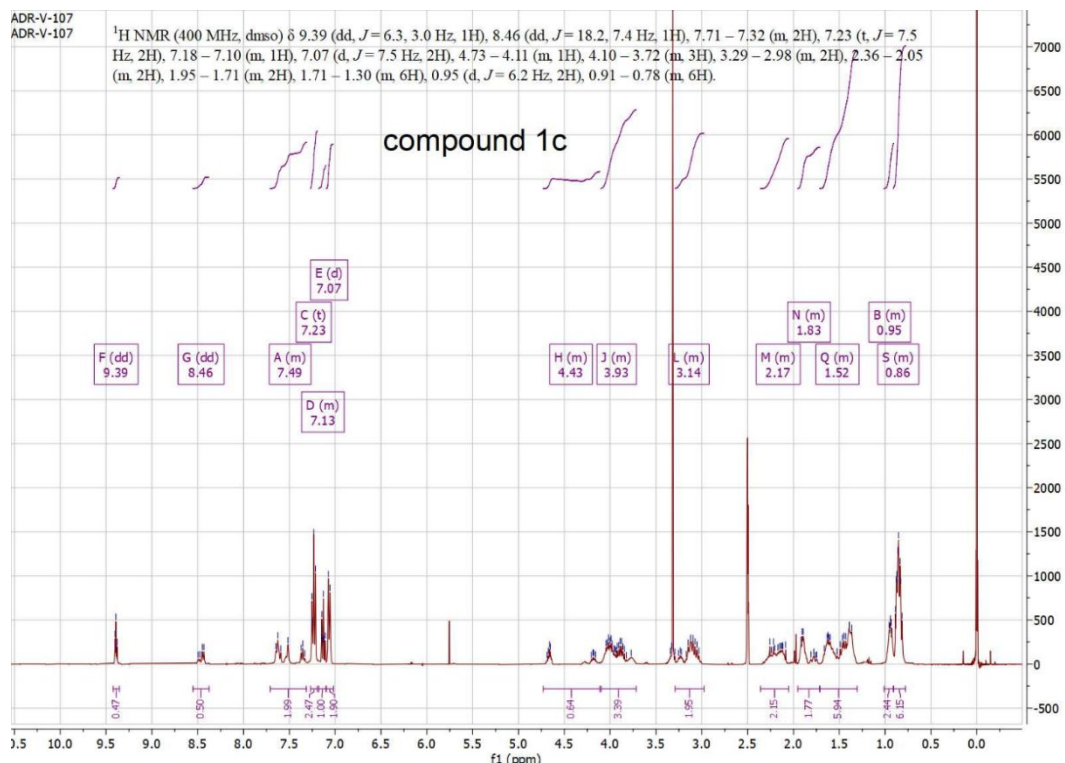

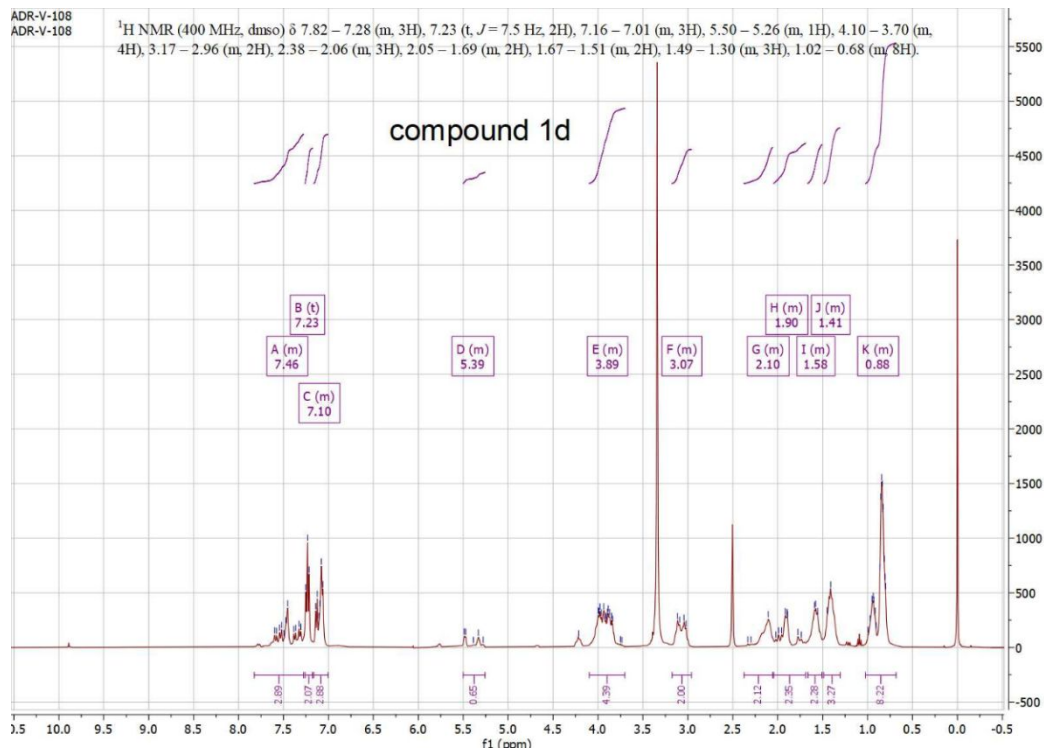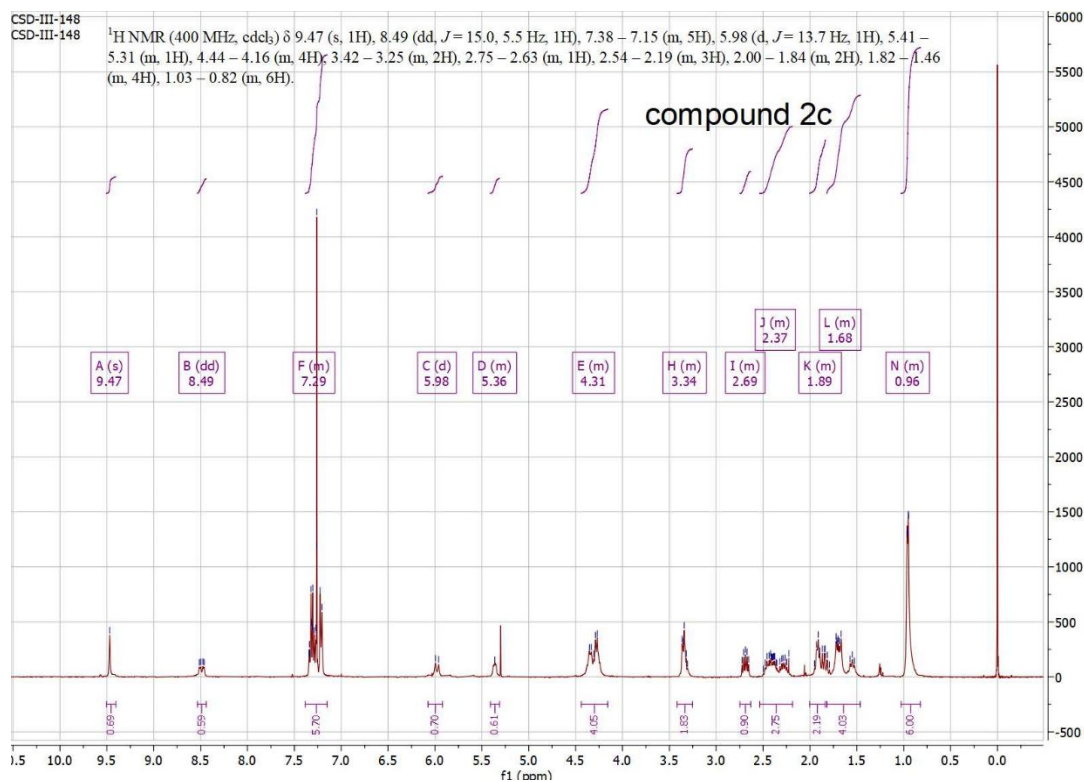



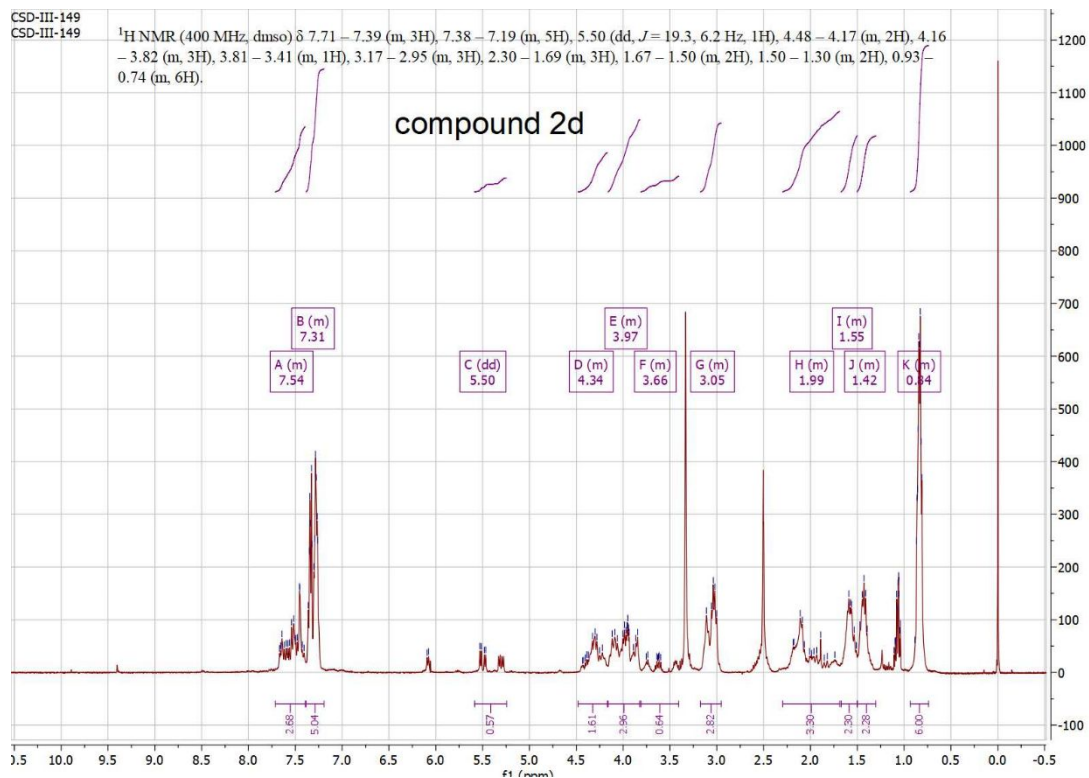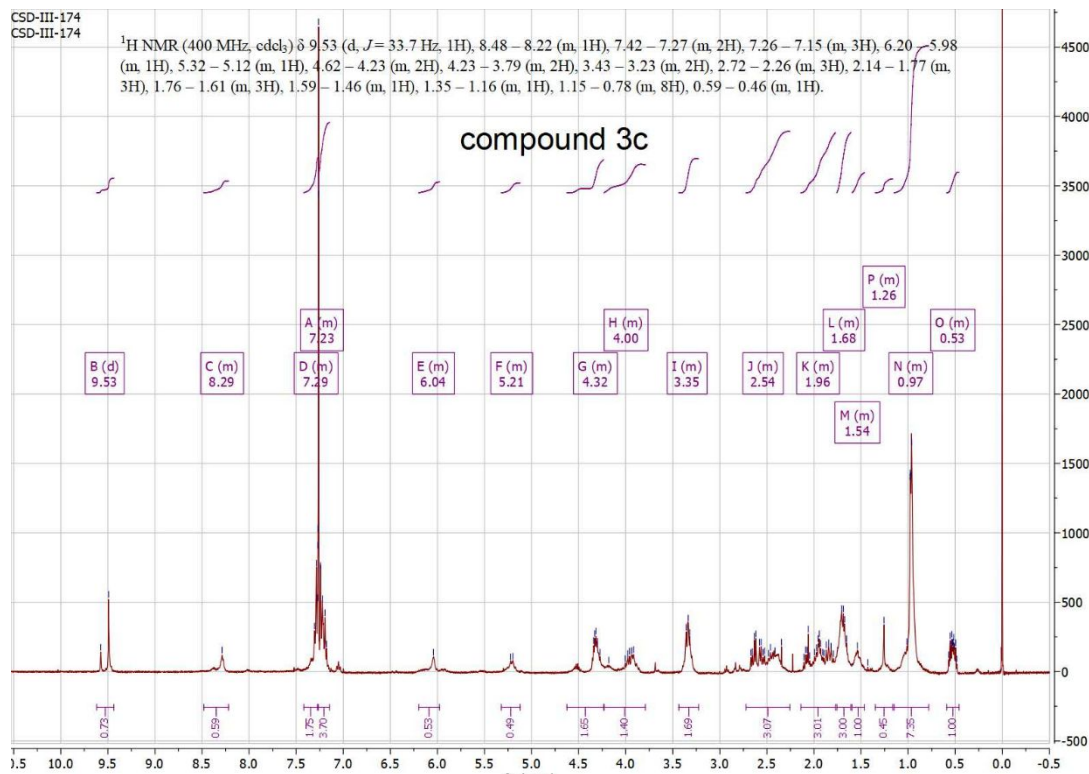

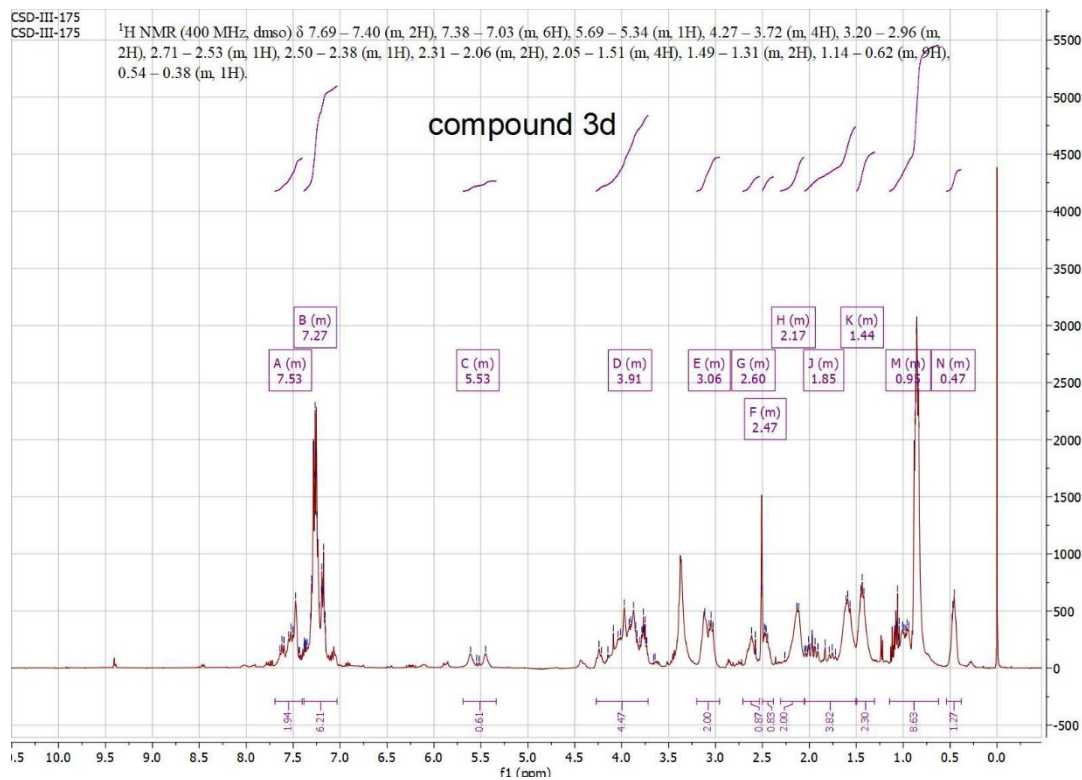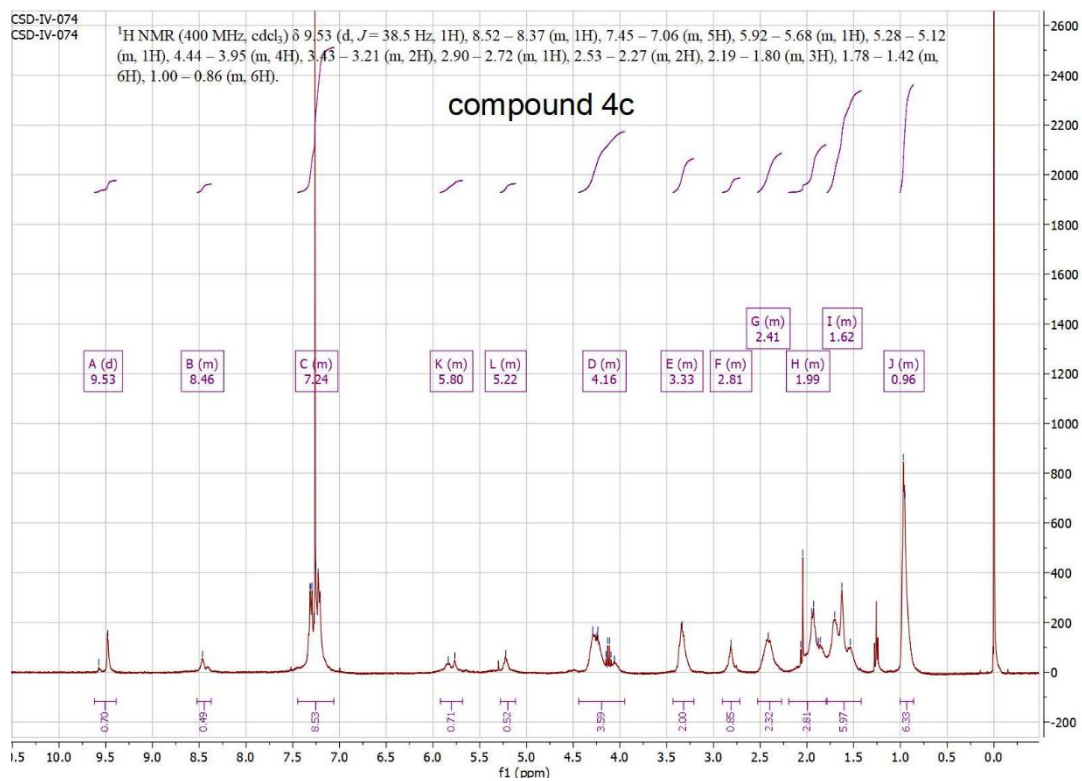

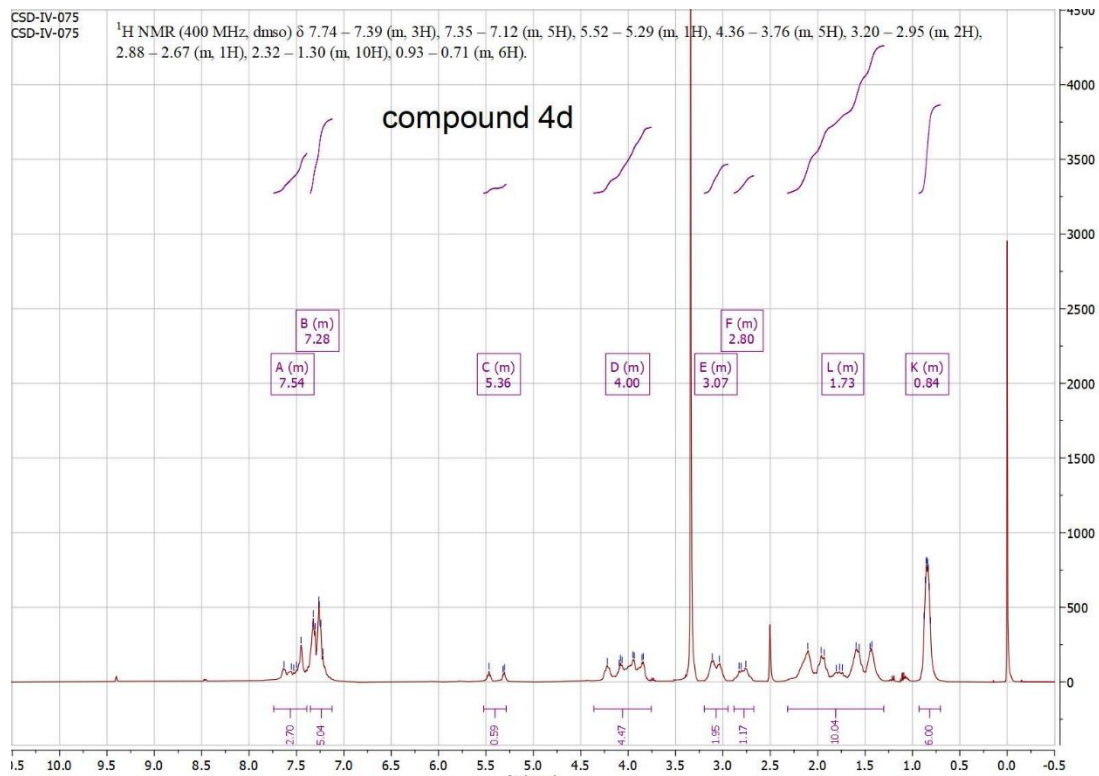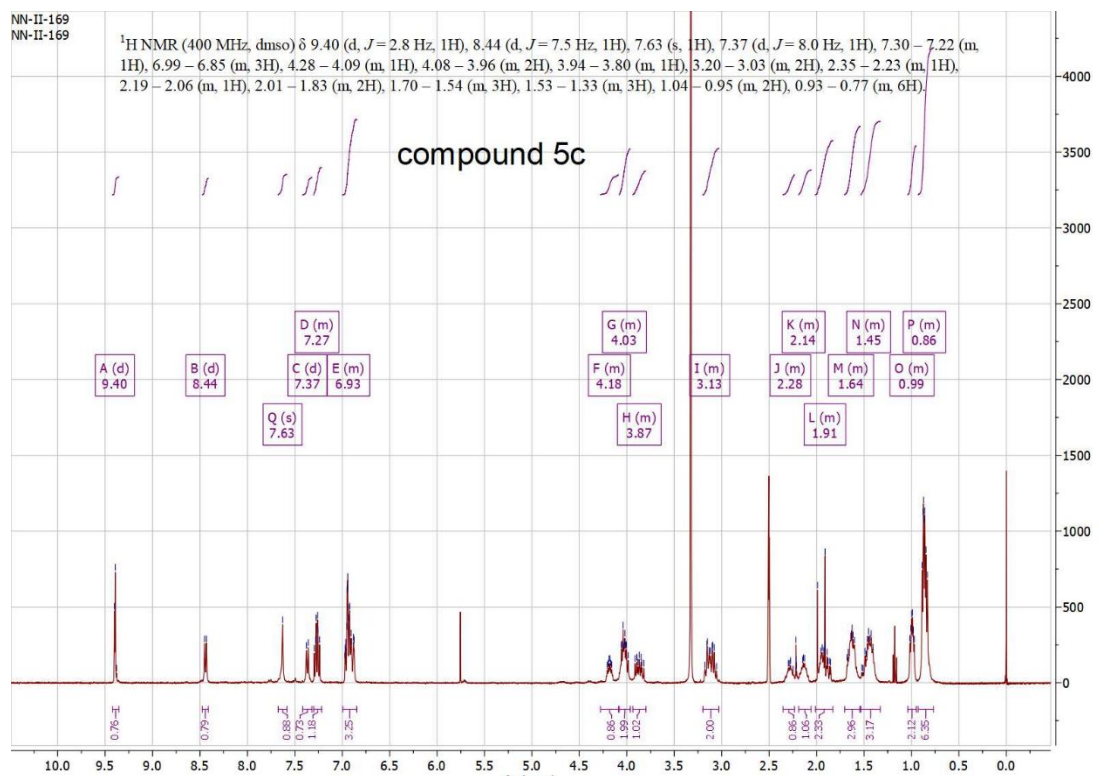

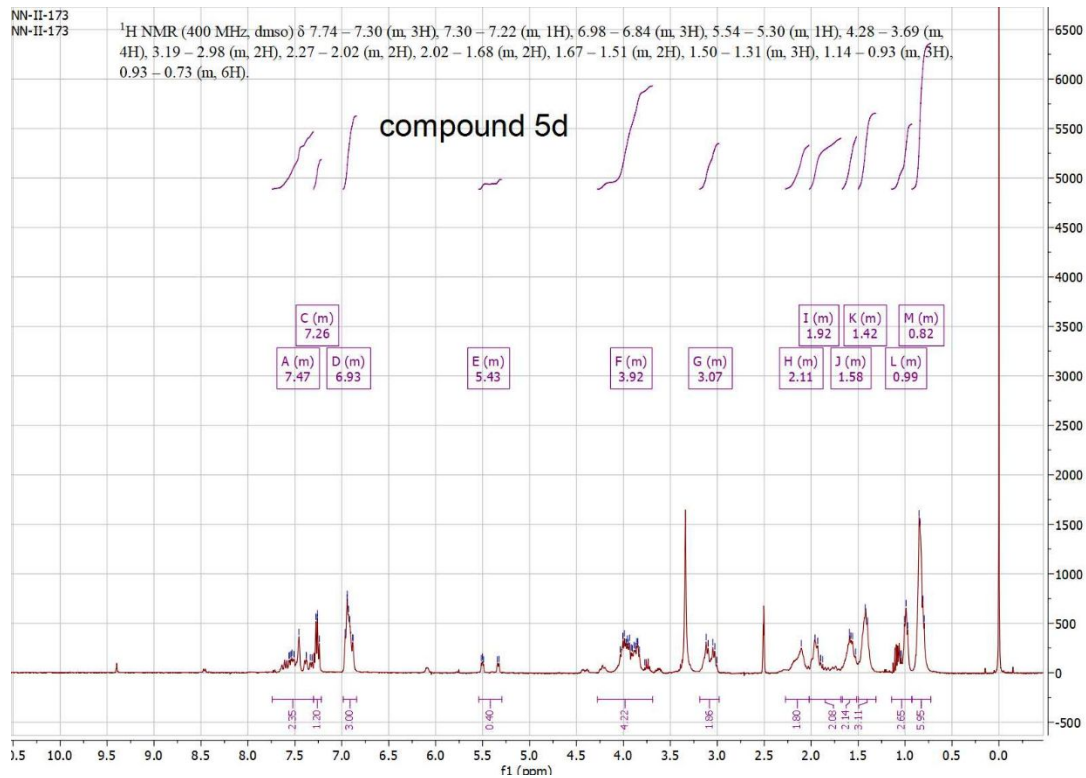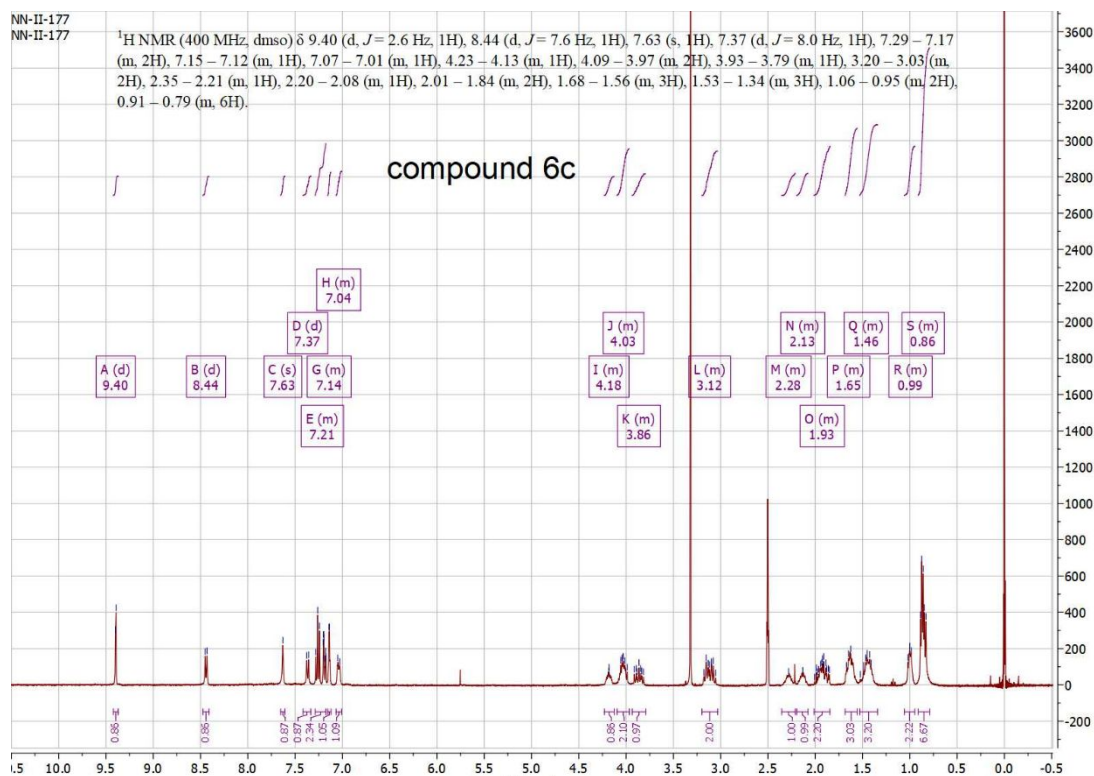

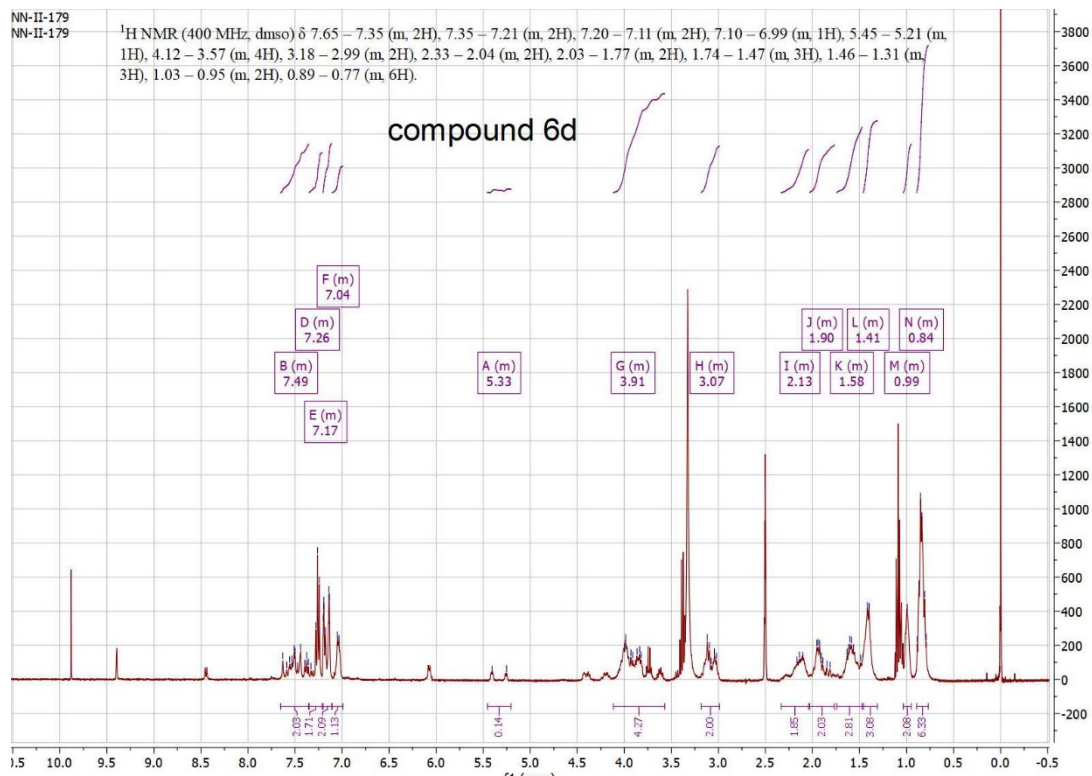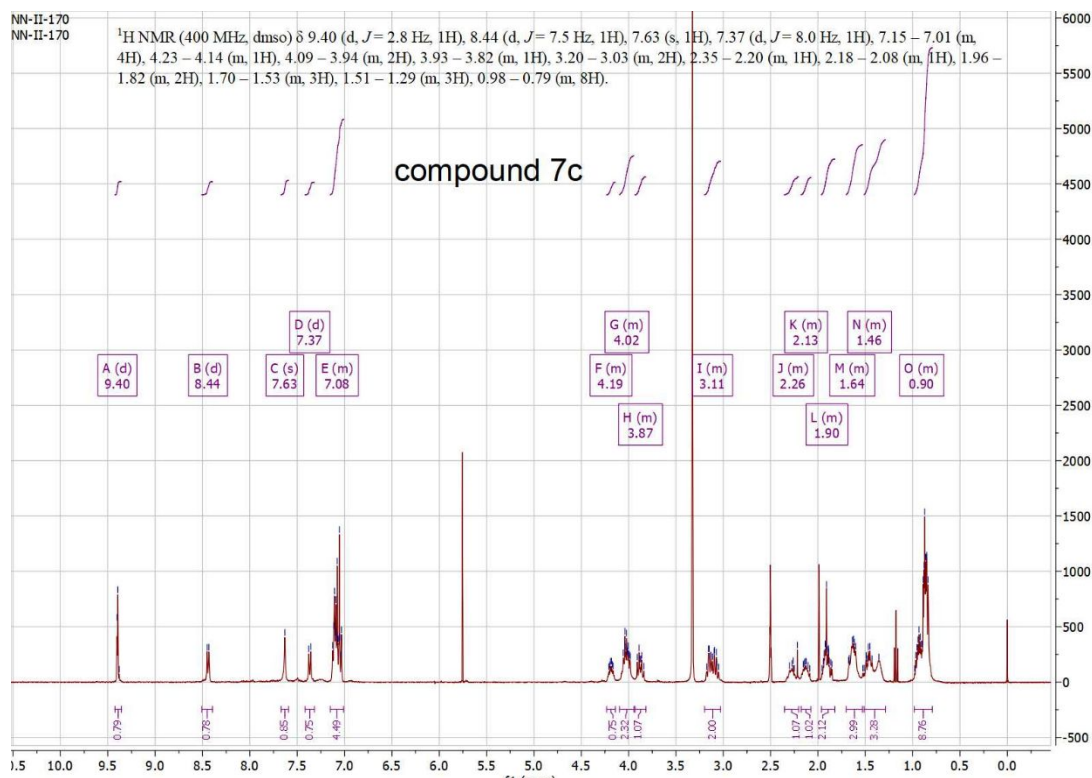

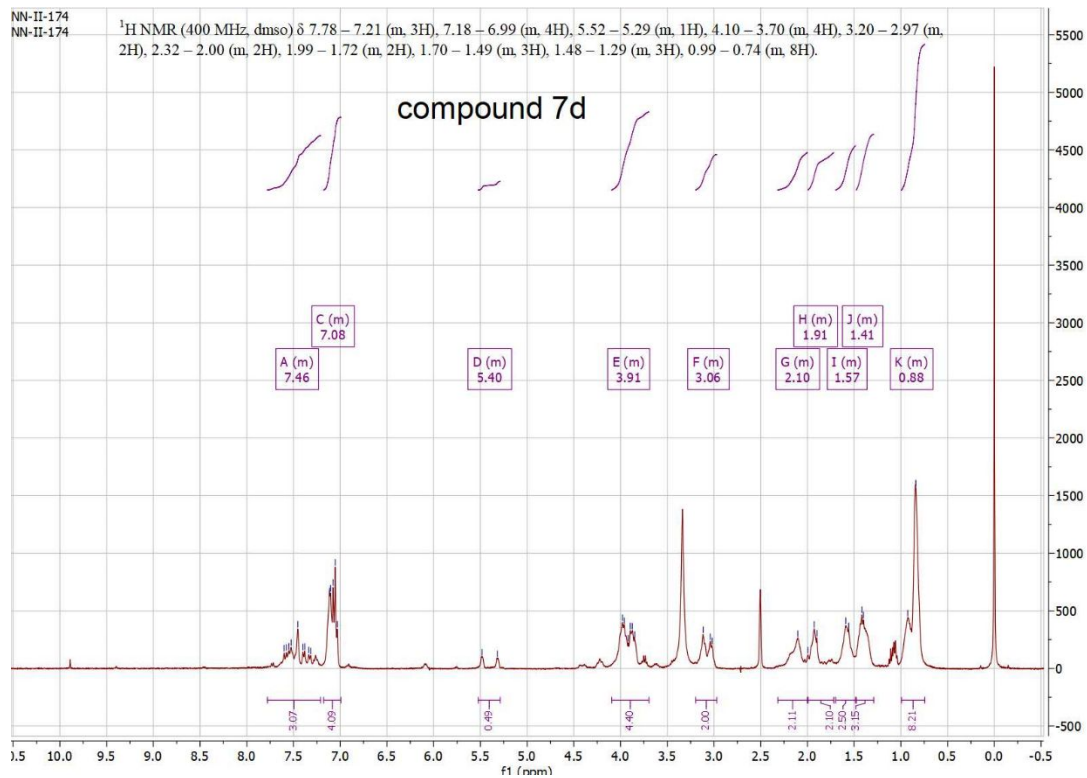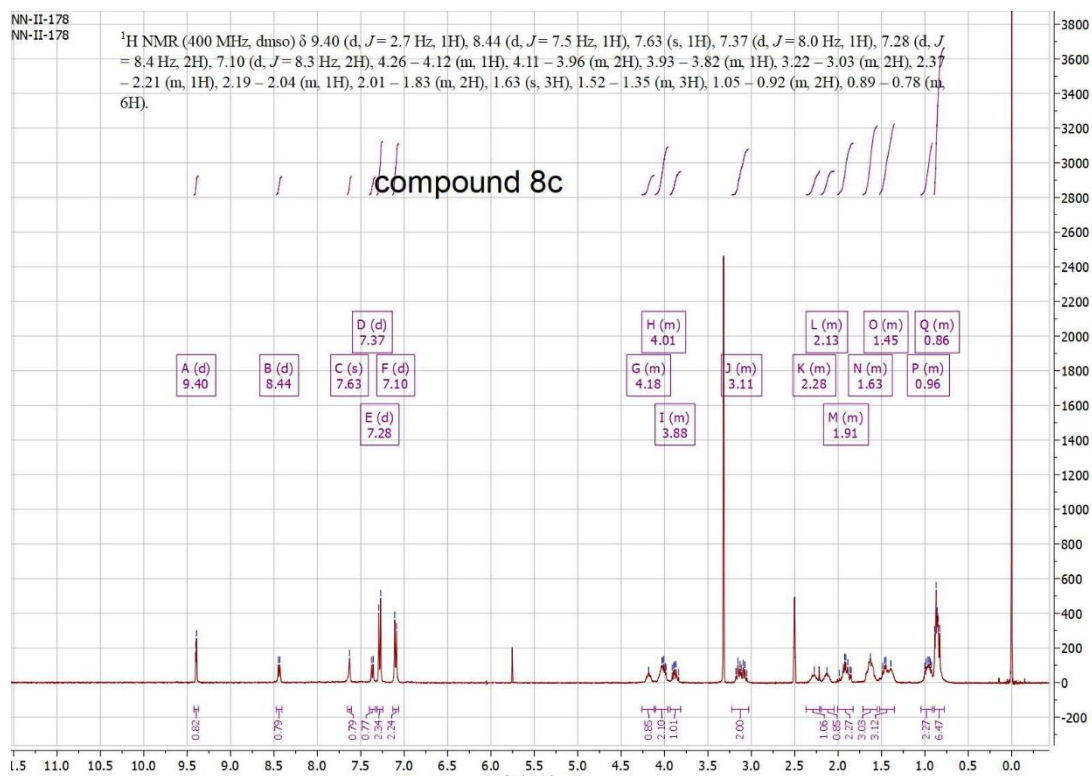

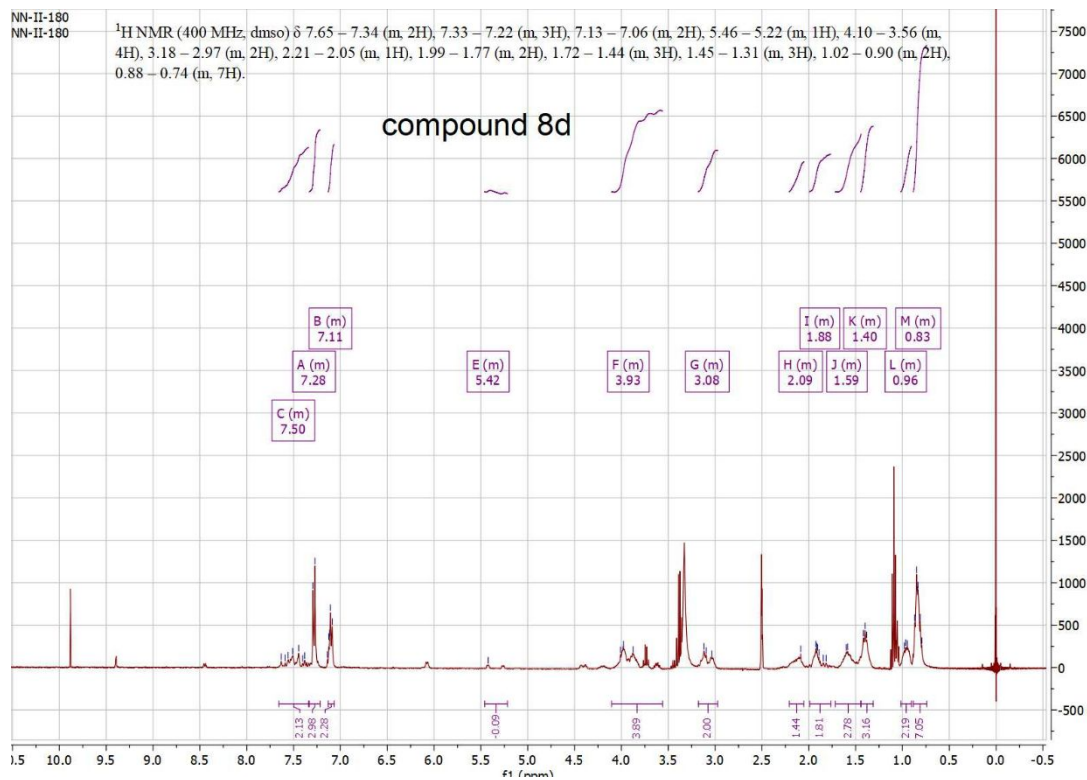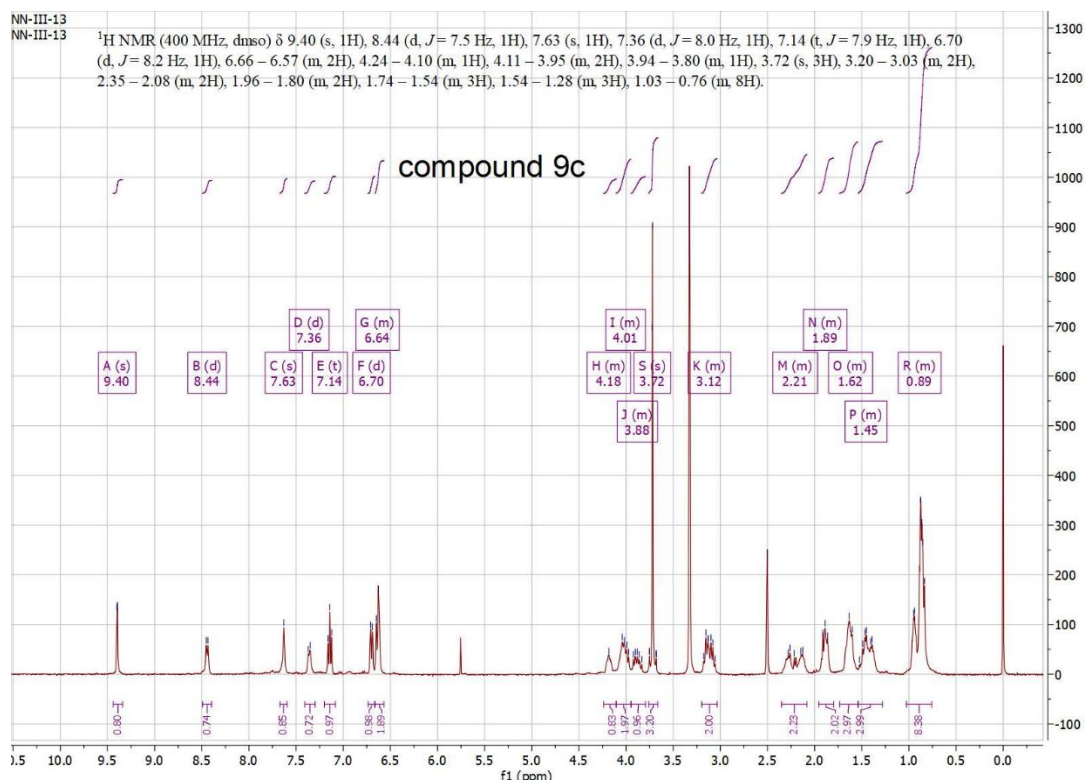

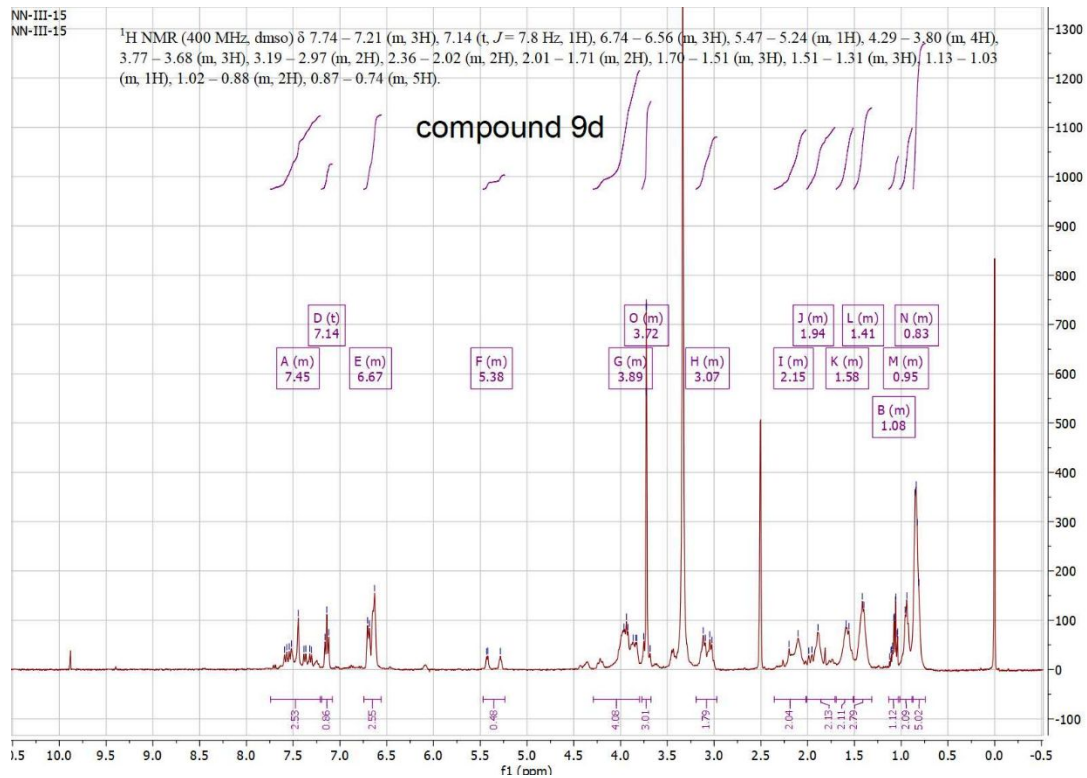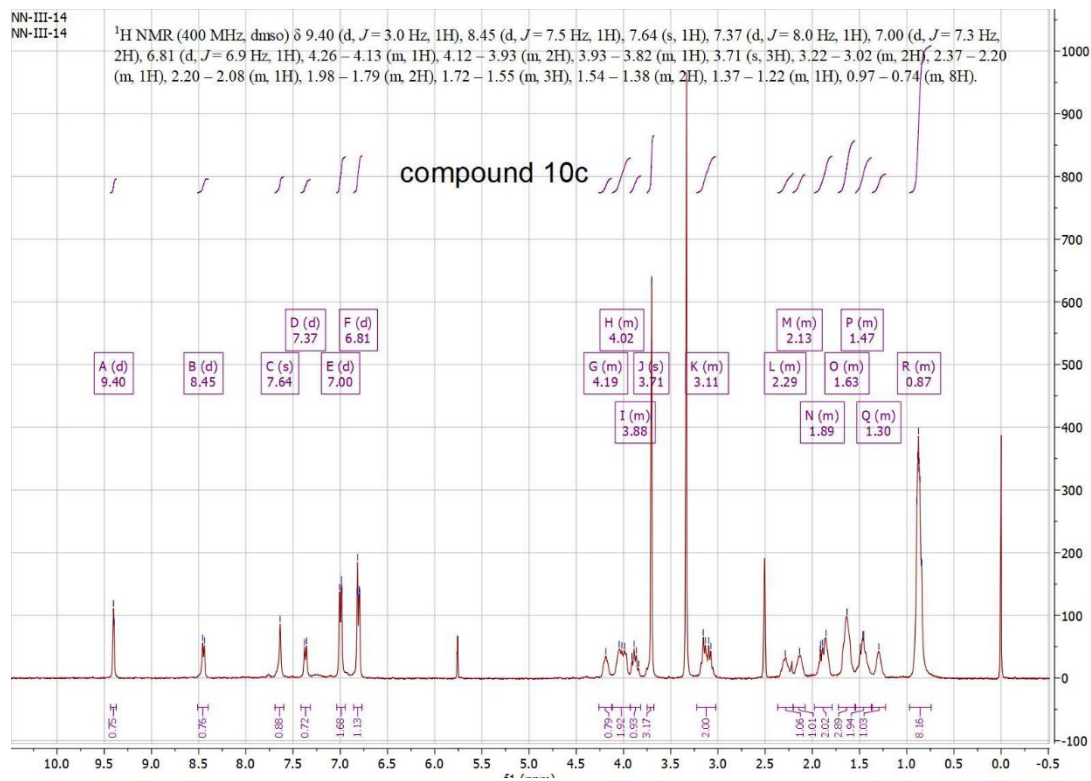



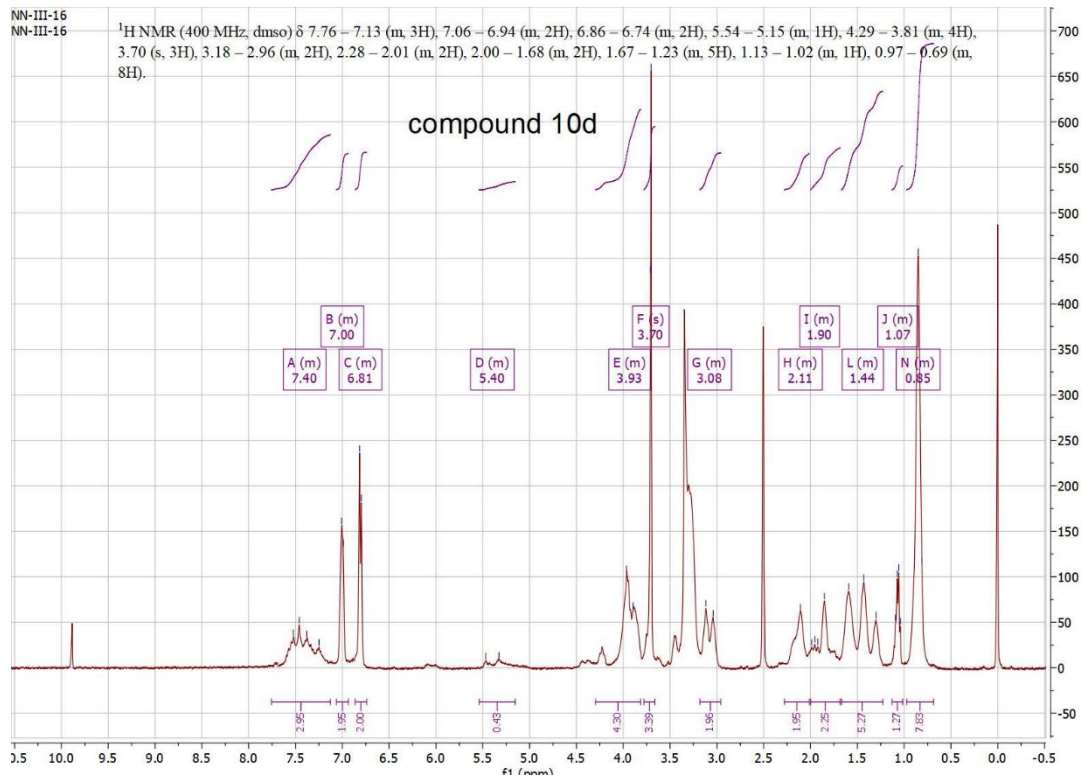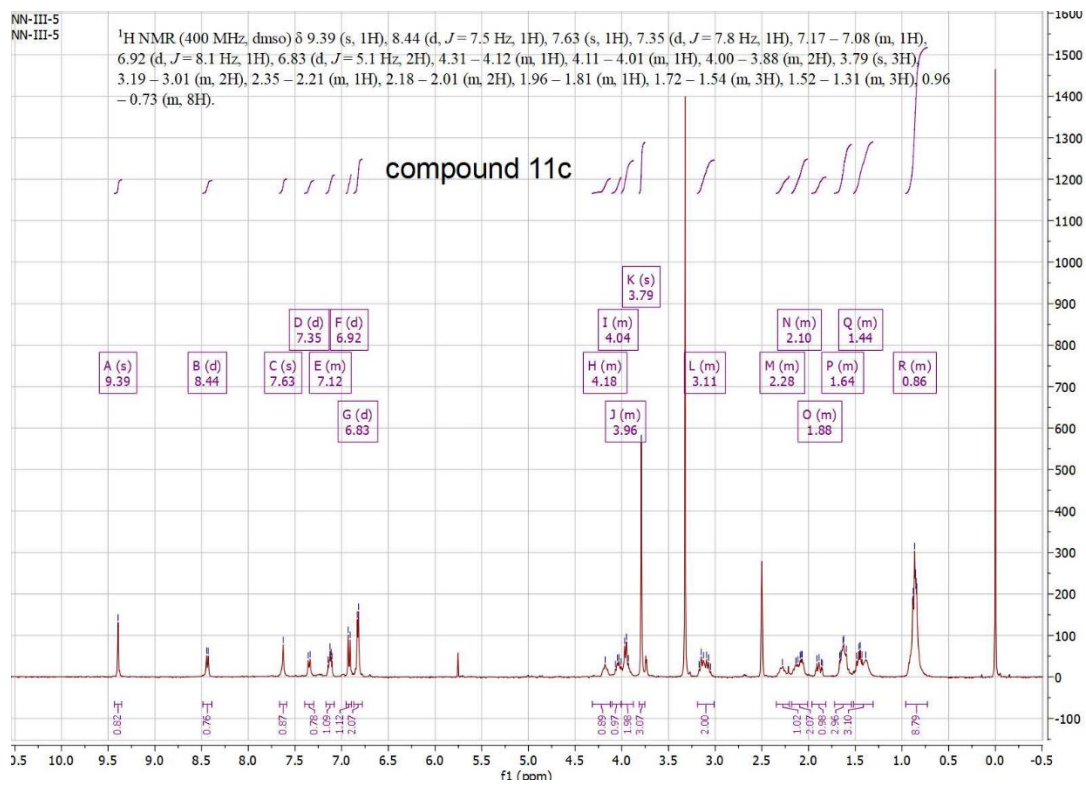

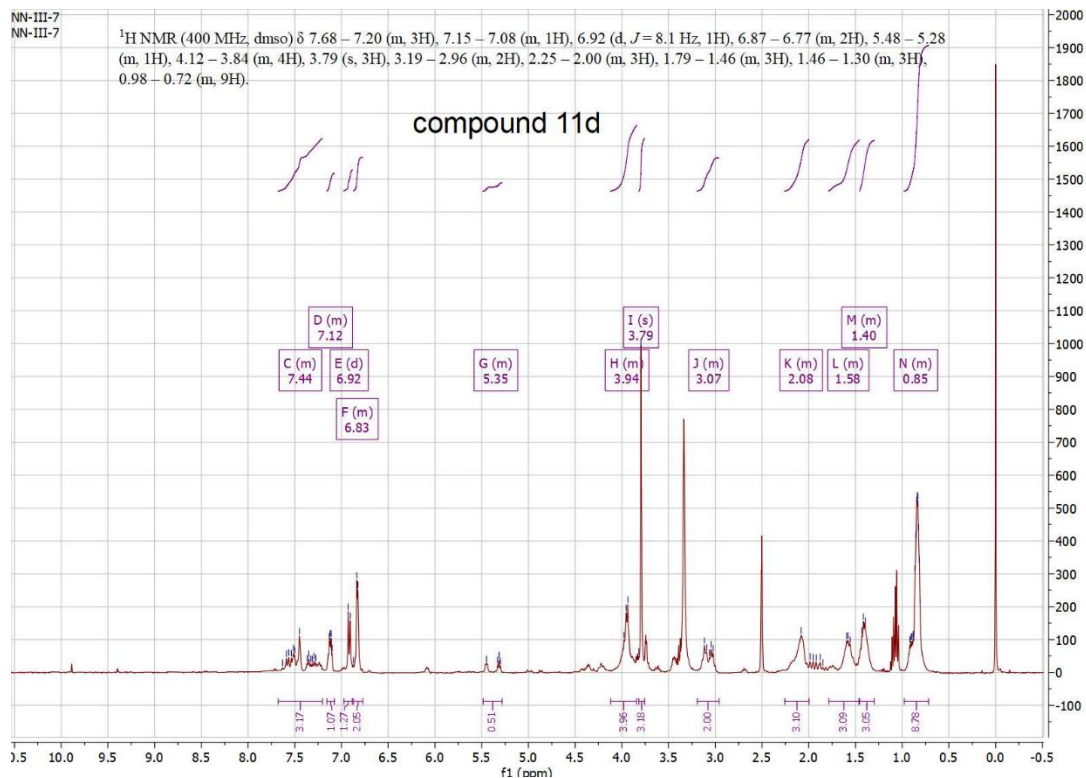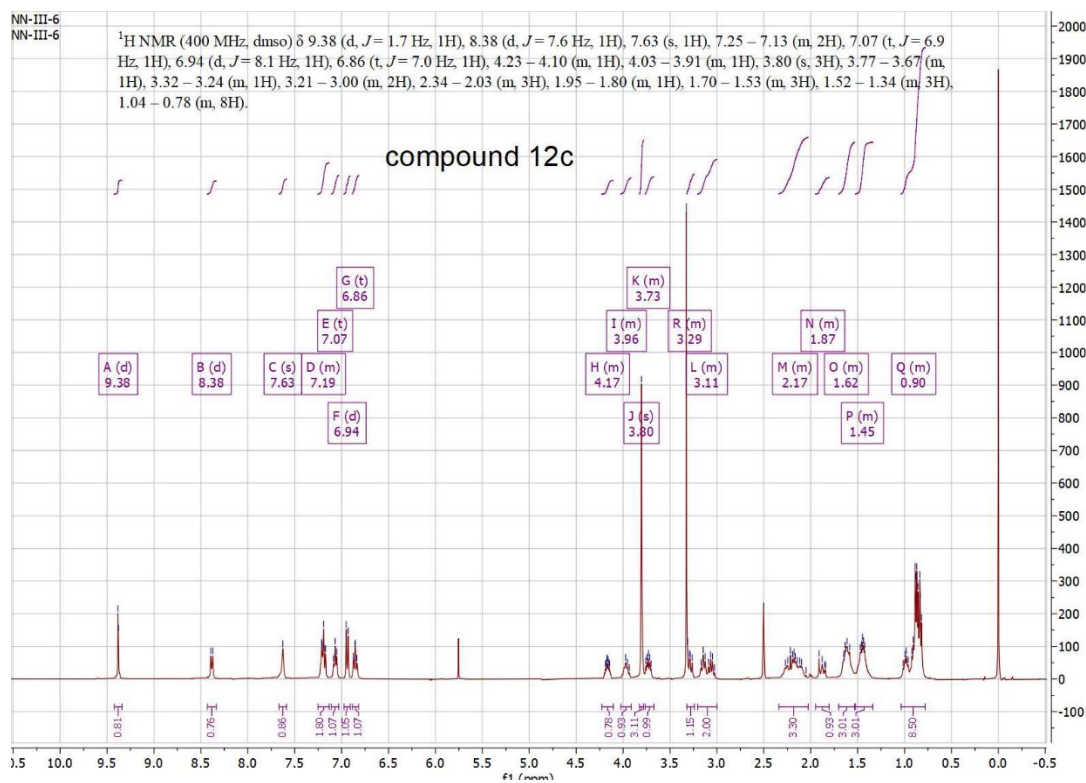

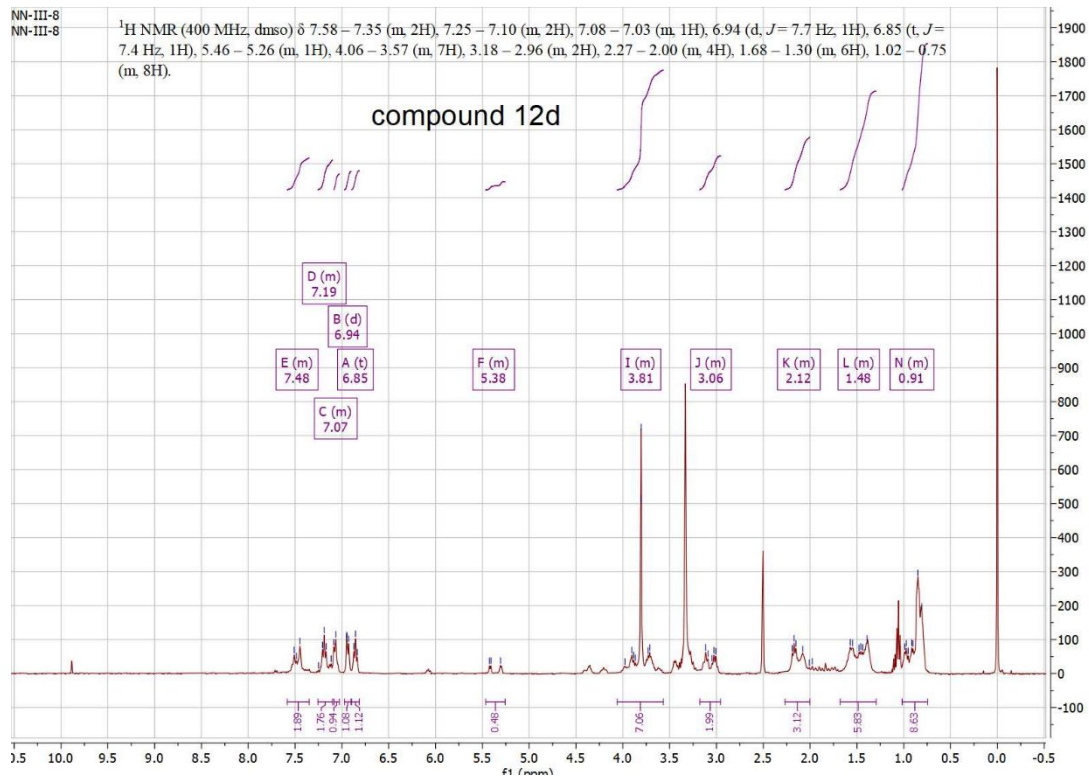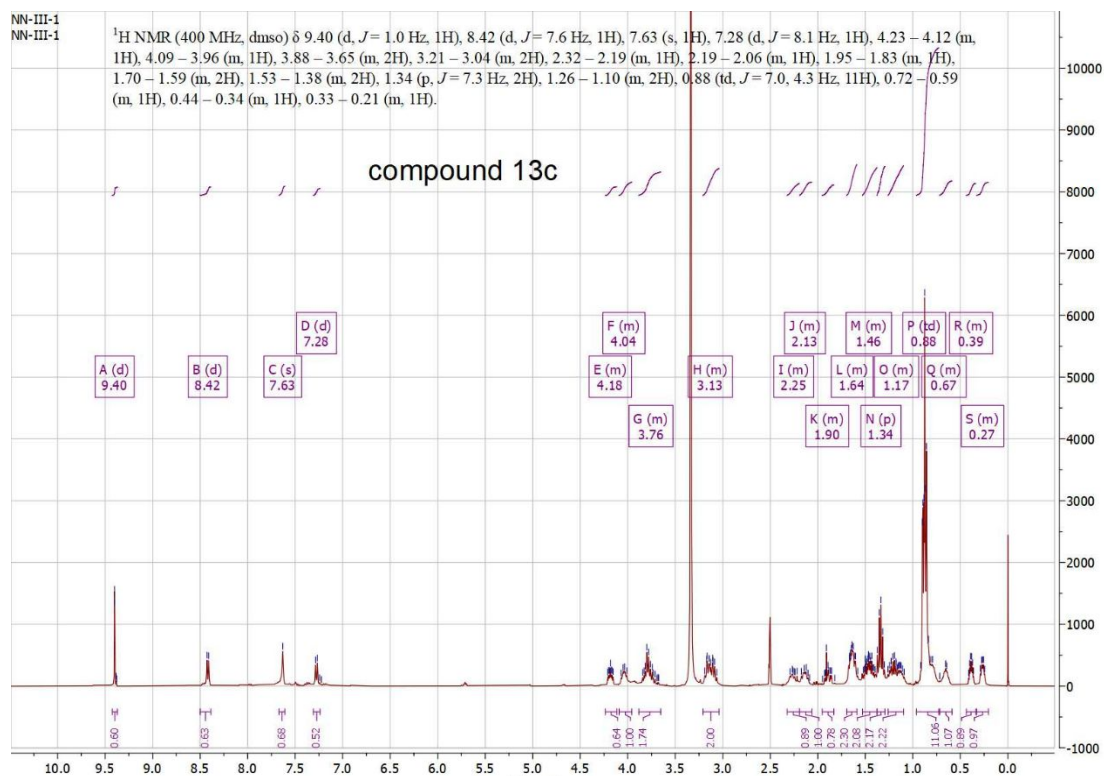

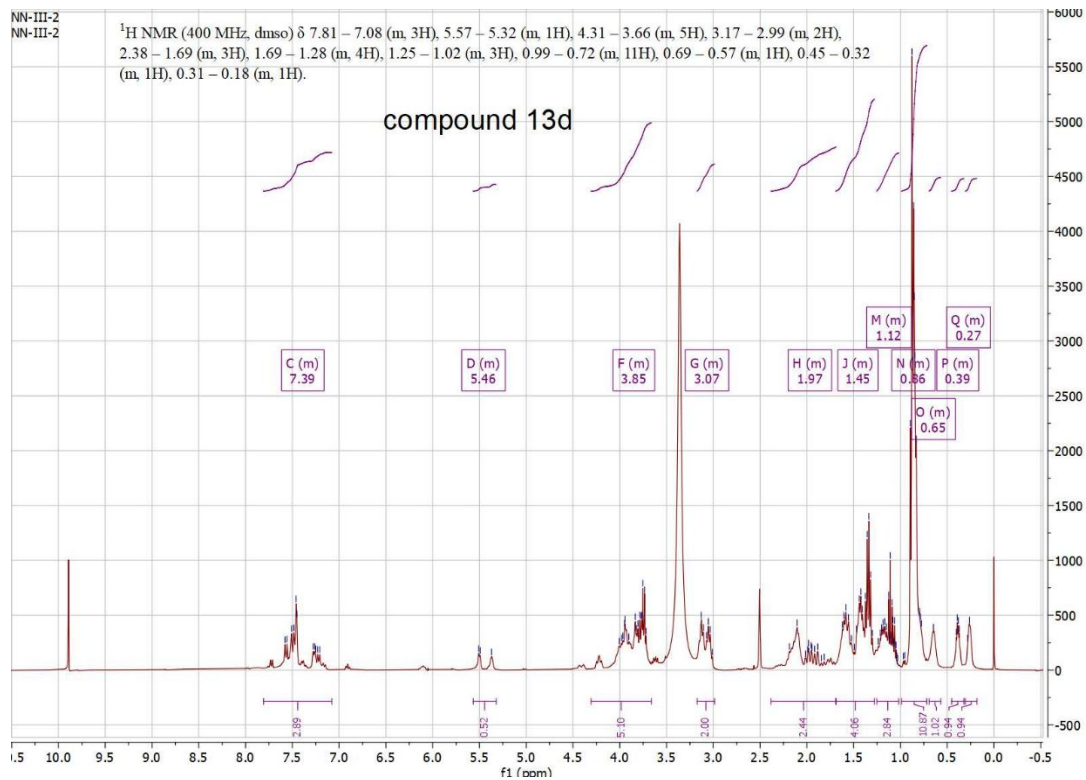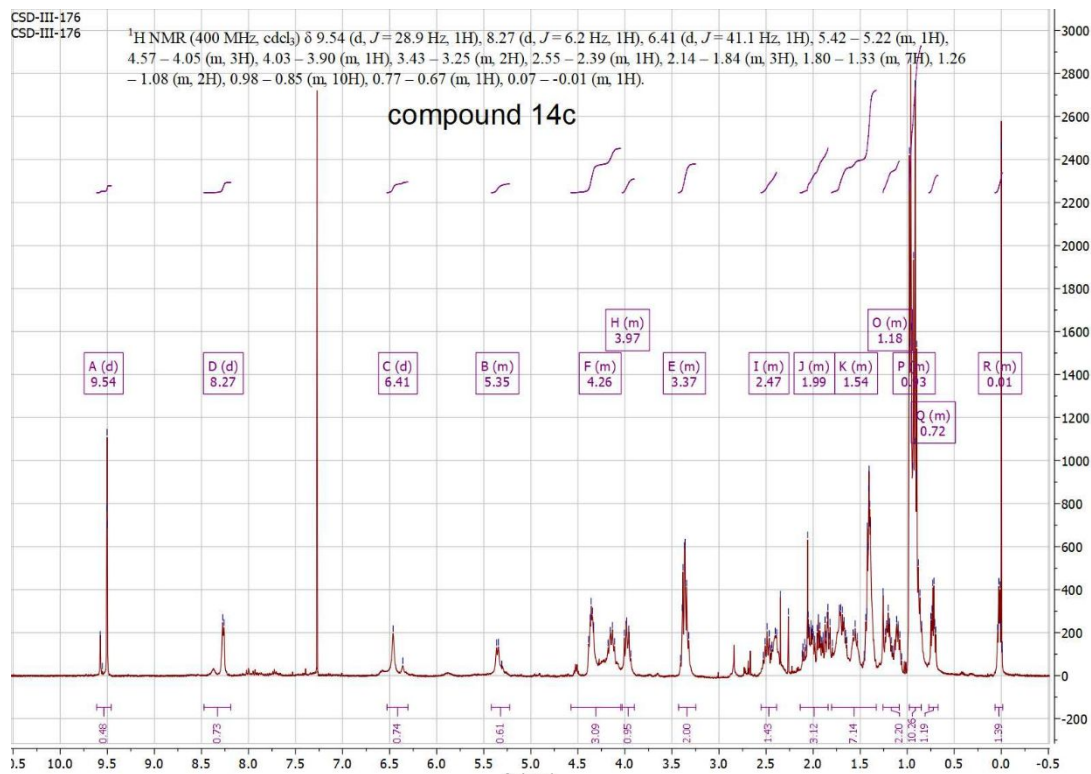

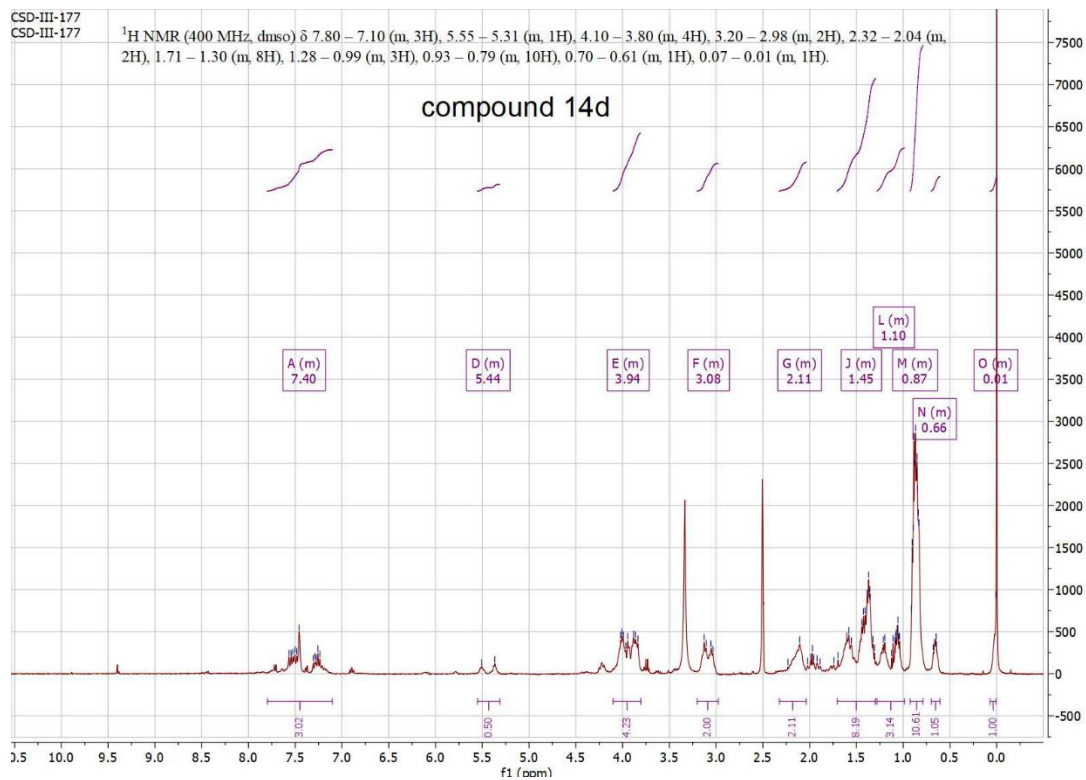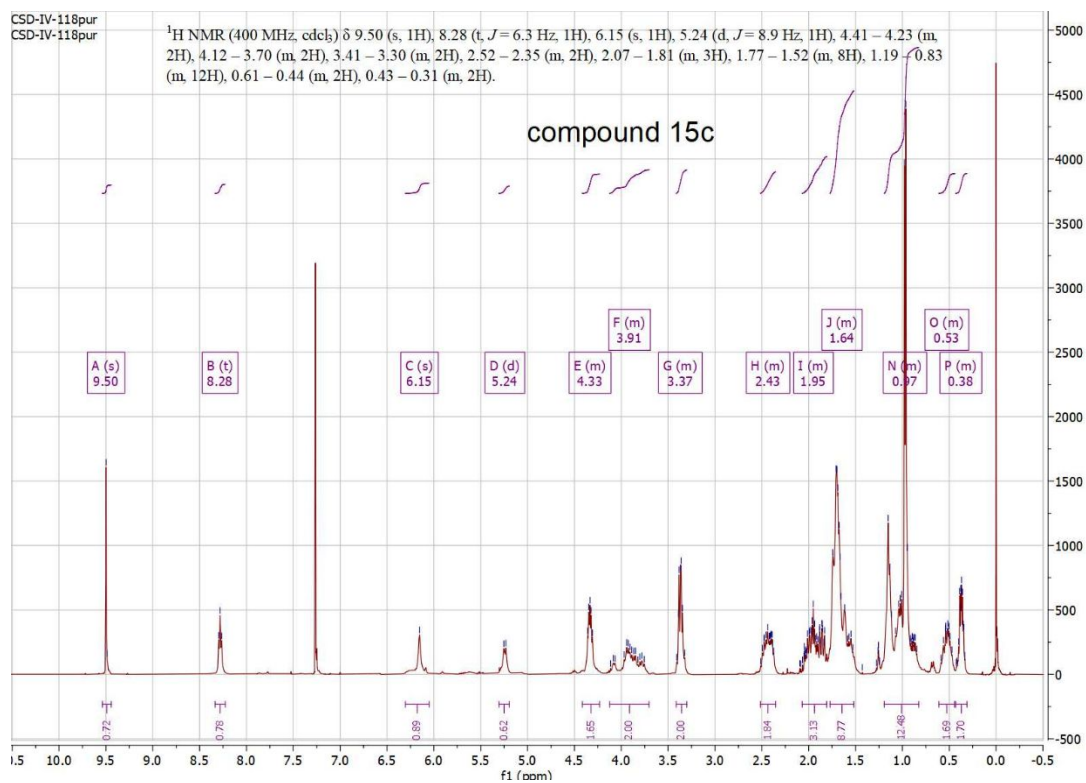

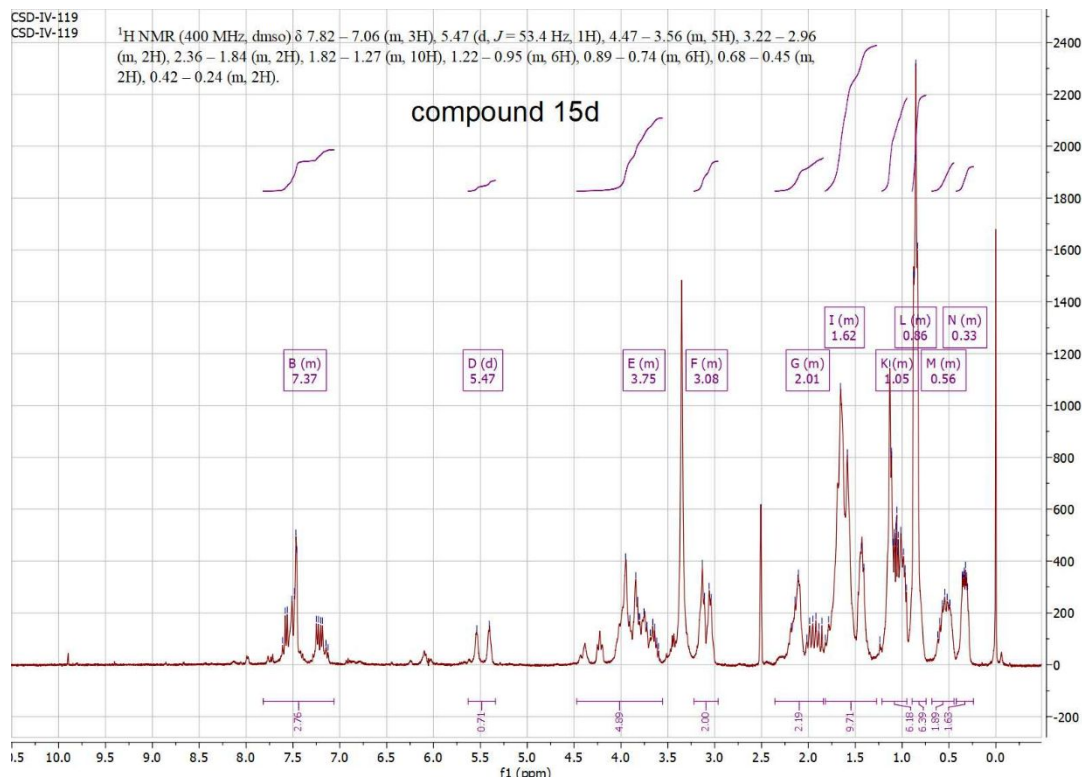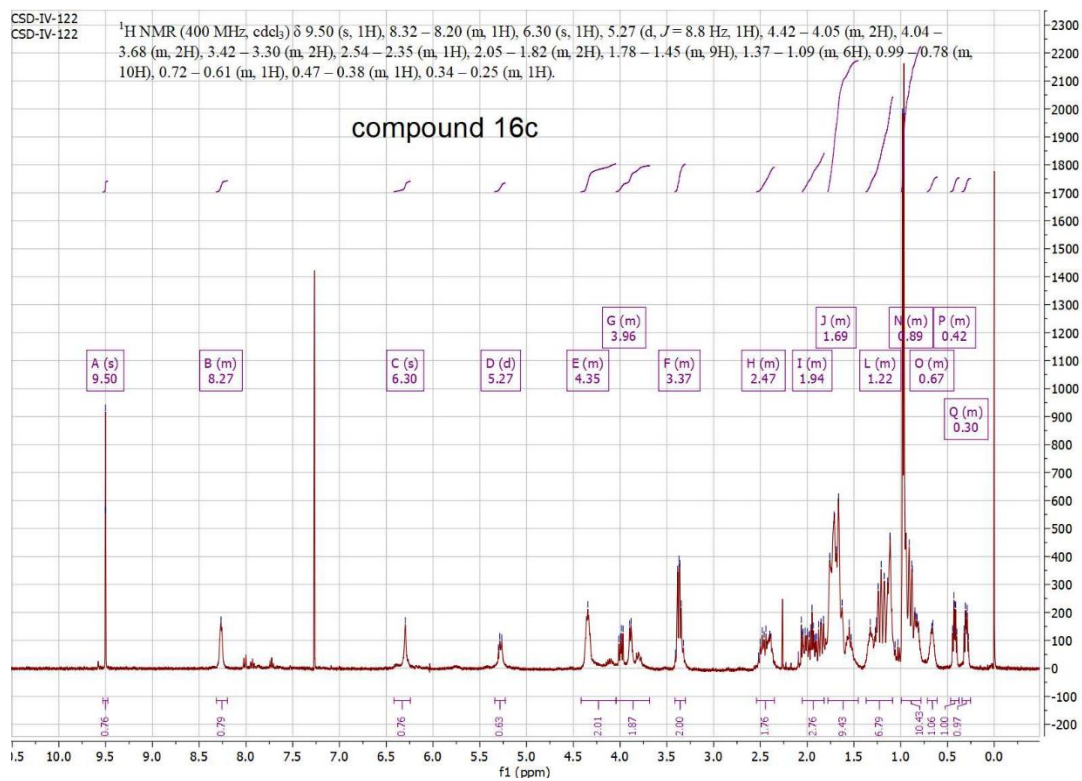

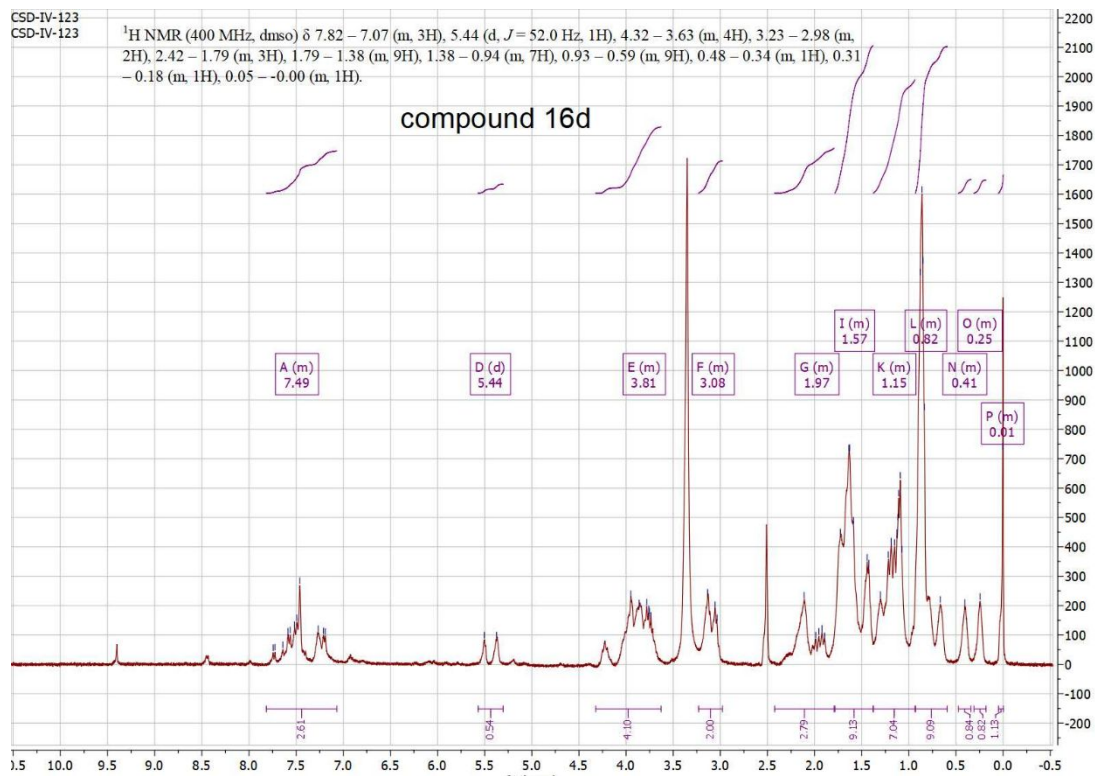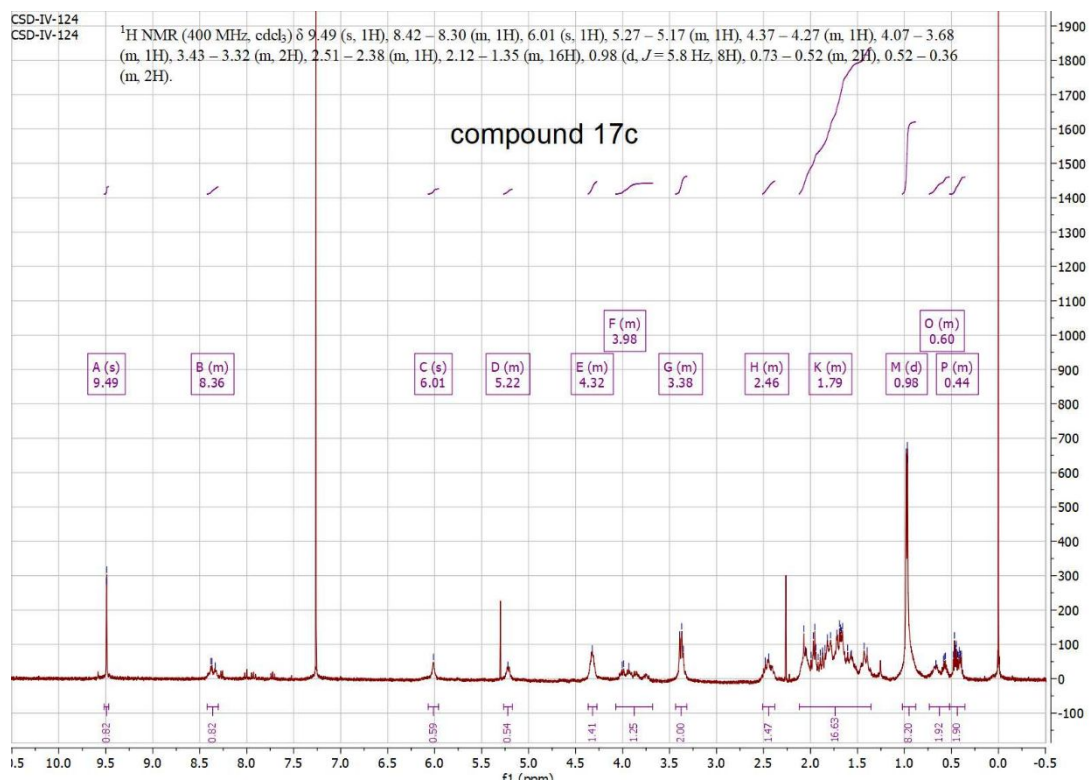

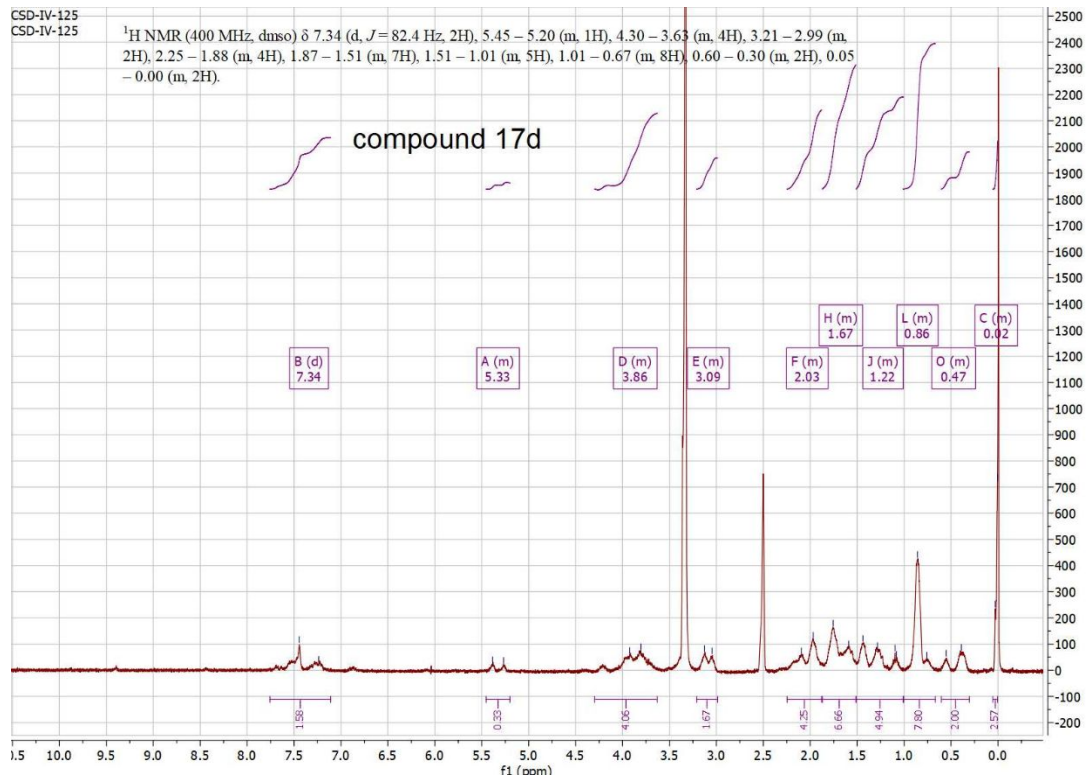



## Determination of purity of compounds **1c/d-17c/d**

**Sample preparation.** Compounds (**1c/d-17c/d**) were weighed into glass vials using an analytical balance (Mettler Toledo XS105) with 0.01 mg accuracy (specific quantities are listed in the table). A stock solution of dimethyl sulfone (*TraceCERT*<sup>®</sup>, 99.82 ±0.18%, lot BCBZ3940, traceability: NIST SRM 84L) in DMSO-d<sub>6</sub> (with 1% v/v TMS) was prepared. A concentration of stock solution was prepared for **1c-17c**, **1d-5d** and **14d-17d** at 2.00 mg/600 μL and for **6d-13d** was 4.00 mg/600 μL. A 600 μL aliquot of stock solution was added into each vial and capped with a lid. The vials were vortex mixed for two minutes to ensure compounds dissolved completely. The content in the vials were quantitatively transferred to 5 mm standard NMR tubes. The tubes were capped, wrapped with PTFE tape, followed by paraffin tape.

| Compound code | <b>1c</b> | <b>2c</b> | <b>3c</b> | <b>4c</b> | <b>5c</b> | <b>6c</b> | <b>7c</b> | <b>8c</b> | <b>9c</b> |
|---------------|-----------|-----------|-----------|-----------|-----------|-----------|-----------|-----------|-----------|
| Weight(mg)    | 12.40     | 13.19     | 11.26     | 10.50     | 11.76     | 12.97     | 11.70     | 13.40     | 12.50     |

| Compound code | <b>10c</b> | <b>11c</b> | <b>12c</b> | <b>13c</b> | <b>14c</b> | <b>15c</b> | <b>16c</b> | <b>17c</b> |
|---------------|------------|------------|------------|------------|------------|------------|------------|------------|
| Weight(mg)    | 11.71      | 12.80      | 12.08      | 9.01       | 11.77      | 12.44      | 9.80       | 10.86      |

| Compound code | <b>1d</b> | <b>2d</b> | <b>3d</b> | <b>4d</b> | <b>5d</b> | <b>6d</b> | <b>7d</b> | <b>8d</b> | <b>9d</b> |
|---------------|-----------|-----------|-----------|-----------|-----------|-----------|-----------|-----------|-----------|
| Weight(mg)    | 13.13     | 11.18     | 14.08     | 11.18     | 11.95     | 11.98     | 12.47     | 12.53     | 11.85     |

| Compound code | <b>10d</b> | <b>11d</b> | <b>12d</b> | <b>13d</b> | <b>14d</b> | <b>15d</b> | <b>16d</b> | <b>17d</b> |
|---------------|------------|------------|------------|------------|------------|------------|------------|------------|
| Weight(mg)    | 13.77      | 13.32      | 14.19      | 14.97      | 14.67      | 13.94      | 11.72      | 9.81       |

**Acquisition.** The instrument and controlled parameters used during the acquisition are listed below.

|                           |                                      |                                                                                                                     |                        |
|---------------------------|--------------------------------------|---------------------------------------------------------------------------------------------------------------------|------------------------|
| NMR instrument            | : Bruker AV III 500                  | Relaxation delay (D1=T <sub>1</sub> x5)                                                                             | : 12 s                 |
| Probe                     | : CPDUL<br>CRYOprobe<br>CP BBO 500S2 | Acquisition time (AQ)                                                                                               | : 2.1845 s (set by TD) |
| Preacquisition delay (DE) | : 10 μs                              | Spectral window (SW)                                                                                                | : 30 ppm               |
| Pulse program             | : Single pulse, zg with 90° pulse    | Transmitter offset                                                                                                  | : 7.5 ppm              |
| Sample temperature        | : 25.0 ± 0.1 °C                      | Number of scans                                                                                                     | : 32                   |
| Data points acquired (TD) | : 64 K                               | 360° Pulse                                                                                                          | : 51.079 μs            |
| Dummy scans (DS)          | : 4                                  | 90° Pulse                                                                                                           | : 12.769 μs            |
| Pulse width (PW):         | : 90°                                | Automatic tuning and automatic matching were performed.<br>Automatic locking and automatic shimming were performed. |                        |

### Post-acquisition processing

|                     |                                         |
|---------------------|-----------------------------------------|
| Apodization         | : LB = 0.1 Hz                           |
| Zero-filling        | : 256 K                                 |
| Phasing             | : Manual phase correction               |
| Baseline correction | : Polynomial fit, 5 <sup>th</sup> order |

**Quantitative measurement of integrals.** TMS was set at 0.0000 ppm. The integral values and range (ppm) of all signals used for quantification have been documented below. The integral of the internal calibrant resonance signal (dimethyl sulfone) is in *Italic*.

| Code     | <b>1c</b>                     | <b>2c</b>                     | <b>3c</b>                     | <b>4c</b>                     |
|----------|-------------------------------|-------------------------------|-------------------------------|-------------------------------|
| Integral | 7.15 .. 7.10 27601.65         | 7.38 .. 7.32 56224.79         | 7.43 .. 7.09 171597.05        | 3.20 .. 3.02 49658.31         |
|          | 7.09 .. 7.02 55534.37         | 7.31 .. 7.23 84120.20         | 3.20 .. 3.01 53109.98         | <i>3.01 .. 2.98 166111.04</i> |
|          | 3.19 .. 3.01 53790.64         | 3.19 .. 3.01 74113.90         | <i>3.01 .. 2.98 165393.47</i> | 0.93 .. 0.76 162350.10        |
|          | <i>3.01 .. 2.99 134221.44</i> | <i>3.00 .. 2.99 136770.50</i> | 1.06 .. 0.92 37663.64         |                               |
|          | 1.00 .. 0.90 56632.74         | 0.92 .. 0.79 165155.96        | 0.92 .. 0.76 173979.53        |                               |
|          | 0.90 .. 0.76 171059.26        |                               | 0.51 .. 0.40 33147.32         |                               |
| Avg.     | 28047.59                      | 29201.14                      | 31299.83                      | 26501.05                      |

| Code     | <b>5c</b>                     | <b>6c</b>                     | <b>7c</b>                     | <b>8c</b>                     |
|----------|-------------------------------|-------------------------------|-------------------------------|-------------------------------|
| Integral | 7.30 .. 7.23 39512.15         | 7.29 .. 7.23 39227.19         | 7.14 .. 7.01 125503.11        | 7.31 .. 7.26 65771.14         |
|          | 6.99 .. 6.84 89627.98         | 7.22 .. 7.17 31990.27         | <i>3.01 .. 2.99 162118.90</i> | 7.13 .. 7.06 62643.44         |
|          | 3.20 .. 3.02 54910.15         | 7.16 .. 7.12 32509.44         | 0.99 .. 0.77 251341.77        | 3.20 .. 3.02 58559.03         |
|          | <i>3.00 .. 2.99 152052.33</i> | 7.07 .. 7.00 33841.56         |                               | <i>3.01 .. 2.98 152578.87</i> |
|          | 1.04 .. 0.95 57632.52         | 3.20 .. 3.02 62493.98         |                               | 1.05 .. 0.91 64872.28         |
|          | 0.92 .. 0.78 173592.17        | <i>3.01 .. 2.99 162817.09</i> |                               | 0.91 .. 0.74 190084.58        |
|          | 1.05 .. 0.94 65759.92         |                               |                               |                               |
|          | 0.91 .. 0.77 197330.68        |                               |                               |                               |
| Avg.     | 29662.5                       | 33082.36                      | 31403.7                       | 31947.6                       |

| Code     | <b>9c</b>                     | <b>10c</b>                    | <b>11c</b>                    | <b>12c</b>                    |
|----------|-------------------------------|-------------------------------|-------------------------------|-------------------------------|
| Integral | 7.18 .. 7.11 31862.83         | 7.04 .. 6.94 57334.04         | 7.16 .. 7.09 33197.60         | 7.25 .. 7.16 44541.58         |
|          | 6.73 .. 6.58 95583.23         | 6.84 .. 6.76 57974.81         | 6.95 .. 6.89 35414.47         | 7.09 .. 7.04 28746.73         |
|          | 3.74 .. 3.69 98004.31         | 3.71 .. 3.69 82761.22         | 6.86 .. 6.78 63855.40         | 6.97 .. 6.91 29074.14         |
|          | 3.19 .. 3.04 66066.20         | 3.19 .. 3.04 53981.74         | 3.82 .. 3.77 93258.08         | 6.89 .. 6.81 30665.39         |
|          | <i>3.01 .. 2.98 161741.07</i> | <i>3.01 .. 2.98 153721.86</i> | 3.20 .. 3.02 65634.73         | 3.83 .. 3.77 87161.54         |
|          |                               | 0.97 .. 0.77 229313.02        | <i>3.01 .. 2.98 161301.27</i> | <i>3.01 .. 2.97 156484.15</i> |
|          |                               | 0.97 .. 0.73 271185.37        | 1.05 .. 0.70 236886.60        |                               |
| Avg.     | 32390.73                      | 28315.58                      | 33090.92                      | 30471.73                      |

| Code     | <b>13c</b>                    | <b>14c</b>                    | <b>15c</b>                    | <b>16c</b>                    |
|----------|-------------------------------|-------------------------------|-------------------------------|-------------------------------|
| Integral | 3.21 .. 3.03 50735.30         | 3.21 .. 3.02 68684.05         | 3.20 .. 3.05 64008.81         | 3.20 .. 3.05 46845.05         |
|          | <i>3.01 .. 2.98 153813.18</i> | <i>3.00 .. 2.99 160715.41</i> | <i>3.01 .. 2.98 143266.72</i> | <i>3.01 .. 2.98 152562.35</i> |
|          | 0.70 .. 0.59 27616.61         | 0.93 .. 0.77 377425.44        | 2.34 .. 2.23 28453.87         | 0.70 .. 0.61 26374.78         |
|          | 0.42 .. 0.35 23538.75         | 0.70 .. 0.61 37506.23         | 2.18 .. 2.09 30133.96         | 0.43 .. 0.35 23693.53         |
|          | 0.30 .. 0.22 24152.70         |                               | 0.64 .. 0.44 63974.68         | 0.28 .. 0.19 23580.00         |
|          |                               | 0.41 .. 0.26 55750.75         |                               |                               |
| Avg.     | 25208.67                      | 34543.98                      | 30290.26                      | 24098.67                      |

| Code     | <b>17c</b>          |                  |
|----------|---------------------|------------------|
| Integral | 3.20 .. 3.04        | 55776.64         |
|          | <i>3.01 .. 2.97</i> | <i>164506.63</i> |
|          | 0.98 .. 0.67        | 233475.40        |
|          | 0.62 .. 0.51        | 23305.10         |
|          | 0.45 .. 0.30        | 46823.96         |
| Avg.     | 27644.7             |                  |

| Code     | <b>1d</b>           |                  | <b>2d</b>           |                  | <b>3d</b>           |                  | <b>4d</b>           |                  |
|----------|---------------------|------------------|---------------------|------------------|---------------------|------------------|---------------------|------------------|
| Integral | 7.27 .. 7.20        | 58128.34         | 7.38 .. 7.23        | 119977.09        | 7.33 .. 7.15        | 147249.89        | <i>3.01 .. 2.97</i> | <i>162671.85</i> |
|          | 7.18 .. 7.02        | 76365.05         | <i>3.00 .. 2.98</i> | <i>163499.22</i> | <i>3.00 .. 2.98</i> | <i>152606.91</i> | 0.93 .. 0.74        | 141224.94        |
|          | <i>3.01 .. 2.97</i> | <i>148877.68</i> | 0.90 .. 0.76        | 140604.97        | 0.91 .. 0.77        | 166997.61        |                     |                  |
|          | 1.02 .. 0.90        | 53973.14         |                     |                  | 0.51 .. 0.41        | 32025.85         |                     |                  |
|          | 0.89 .. 0.75        | 159588.58        |                     |                  |                     |                  |                     |                  |
| Avg.     | 26773.47            |                  | 23689.28            |                  | 28856.11            |                  | 23537.49            |                  |

| Code     | <b>5d</b>           |                  | <b>6d</b>           |                  | <b>7d</b>           |                  | <b>8d</b>           |                  |
|----------|---------------------|------------------|---------------------|------------------|---------------------|------------------|---------------------|------------------|
| Integral | 7.30 .. 7.23        | 32364.19         | 7.29 .. 7.23        | 31557.31         | 7.31 .. 7.25        | 50398.24         | 7.30 .. 7.25        | 49587.72         |
|          | 6.98 .. 6.85        | 81015.99         | 7.21 .. 7.00        | 72165.85         | 7.15 .. 7.06        | 45621.89         | 7.13 .. 7.07        | 42647.81         |
|          | <i>3.01 .. 2.98</i> | <i>162112.51</i> | <i>3.01 .. 2.98</i> | <i>160598.11</i> | <i>3.00 .. 2.98</i> | <i>268957.15</i> | <i>3.00 .. 2.99</i> | <i>266588.84</i> |
|          | 1.03 .. 0.95        | 51182.52         | 1.03 .. 0.95        | 47085.52         | 1.03 .. 0.91        | 46140.94         | 1.02 .. 0.91        | 45294.24         |
|          | 0.90 .. 0.75        | 158157.98        | 0.90 .. 0.75        | 144654.41        | 0.90 .. 0.77        | 135347.83        | 0.88 .. 0.77        | 132164.18        |
| Avg.     | 26893.39            |                  | 24621.92            |                  | 23125.74            |                  | 22474.50            |                  |

| Code     | <b>9d</b>           |                  | <b>10d</b>          |                  | <b>11d</b>          |                     | <b>12d</b>       |          |
|----------|---------------------|------------------|---------------------|------------------|---------------------|---------------------|------------------|----------|
| Integral | 7.17 .. 7.10        | 18767.60         | 7.04 .. 6.97        | 48649.37         | 7.16 .. 7.09        | 24220.69            | 7.22 .. 7.17     | 29529.03 |
|          | 6.73 .. 6.60        | 56852.66         | 6.84 .. 6.78        | 49996.91         | 6.94 .. 6.90        | 24577.07            | 7.10 .. 7.04     | 27367.66 |
|          | 3.74 .. 3.70        | 57949.80         | 3.71 .. 3.69        | 73315.25         | 6.86 .. 6.79        | 44966.77            | 6.96 .. 6.91     | 26002.00 |
|          | <i>3.01 .. 2.97</i> | <i>257392.13</i> | <i>3.01 .. 2.98</i> | <i>267459.75</i> | 3.81 .. 3.77        | 68358.79            | 6.89 .. 6.82     | 26127.23 |
|          | 1.01 .. 0.76        | 167755.45        | 0.95 .. 0.78        | 203613.72        | <i>3.01 .. 2.98</i> | <i>267098.83</i>    | 3.82 .. 3.79     | 86009.97 |
|          |                     |                  |                     | 0.98 .. 0.73     | 198351.82           | <i>3.02 .. 2.97</i> | <i>280486.35</i> |          |
|          |                     |                  |                     |                  |                     | 1.02 .. 0.75        | 210298.68        |          |
| Avg.     | 20088.37            |                  | 25038.35            |                  | 24031.68            |                     | 27022.3          |          |

| Code     | <b>13d</b>          |                  | <b>14d</b>          |                  | <b>15d</b>          |                  | <b>16d</b>          |                  |
|----------|---------------------|------------------|---------------------|------------------|---------------------|------------------|---------------------|------------------|
| Integral | 3.17 .. 3.09        | 19710.27         | 3.18 .. 3.09        | 27082.74         | 3.18 .. 3.09        | 31948.57         | 3.19 .. 3.09        | 30718.38         |
|          | 3.08 .. 3.01        | 17432.69         | 3.09 .. 3.01        | 21616.39         | 3.09 .. 3.01        | 26635.23         | 3.08 .. 3.01        | 21982.97         |
|          | <i>3.01 .. 2.96</i> | <i>160845.93</i> | <i>3.01 .. 2.97</i> | <i>228007.38</i> | <i>3.01 .. 2.98</i> | <i>162246.78</i> | <i>3.01 .. 2.98</i> | <i>154122.65</i> |
|          | 0.70 .. 0.59        | 19638.02         | 0.94 .. 0.77        | 248988.14        | 0.91 .. 0.77        | 197240.35        | 0.70 .. 0.60        | 24975.16         |
|          | 0.43 .. 0.34        | 17103.57         | 0.71 .. 0.59        | 24195.02         |                     |                  | 0.46 .. 0.35        | 23409.90         |
|          | 0.31 .. 0.20        | 18140.96         |                     |                  |                     |                  | 0.28 .. 0.19        | 22935.89         |
| Avg.     | 18405.1             |                  | 24760.2             |                  | 31978.02            |                  | 24804.46            |                  |

| Code     | <b>17d</b>          |                  |
|----------|---------------------|------------------|
| Integral | 3.17 .. 3.09        | 25788.16         |
|          | 3.08 .. 3.02        | 21650.05         |
|          | <i>3.01 .. 2.99</i> | <i>160256.81</i> |
|          | 0.89 .. 0.81        | 157335.03        |
|          | 0.79 .. 0.70        | 20322.52         |
|          | 0.61 .. 0.50        | 19325.96         |
|          | 0.45 .. 0.32        | 39028.50         |
| Avg.     | 20246.44            |                  |

### Calculation of purity

$$P [\%] = \frac{n_{IC} \cdot Int_t \cdot MW_t \cdot m_{IC}}{n_t \cdot Int_{IC} \cdot MW_{IC} \cdot m_s} \cdot P_{IC}$$

- $P$  – purity of the target analyte, %
- $P_{IC}$  – purity of the internal calibrant, %
- $n_{IC}$  – number of protons that give rise to  $Int_{IC}$
- $n_t$  – number of protons that give rise to  $Int_t$
- $Int_{IC}$  – integral of the internal calibrant resonance signal
- $Int_t$  – integral of the target analyte resonance signal
- $MW_{IC}$  – molecular weight of the internal calibrant
- $MW_t$  – molecular weight of the target analyte
- $m_{IC}$  – weight of the internal calibrant
- $m_s$  – weight of the target analyte

### Purity of c-series compounds

| Compound code | Purity (%) |
|---------------|------------|
| <b>1c</b>     | 95.1       |
| <b>2c</b>     | 98.8       |
| <b>3c</b>     | 97.9       |
| <b>4c</b>     | 95.4       |
| <b>5c</b>     | 97.4       |
| <b>6c</b>     | 95.3       |
| <b>7c</b>     | 97.2       |
| <b>8c</b>     | 95.0       |
| <b>9c</b>     | 96.5       |

| Compound code | Purity (%) |
|---------------|------------|
| <b>10c</b>    | 94.8       |
| <b>11c</b>    | 96.6       |
| <b>12c</b>    | 97.1       |
| <b>13c</b>    | 94.8       |
| <b>14c</b>    | 95.2       |
| <b>15c</b>    | 97.2       |
| <b>16c</b>    | 95.1       |
| <b>17c</b>    | 95.6       |

## Purity of d-series compounds

| Compound code | Purity (%) |
|---------------|------------|
| <b>1d</b>     | 95.4       |
| <b>2d</b>     | 96.2       |
| <b>3d</b>     | 96.0       |
| <b>4d</b>     | 98.4       |
| <b>5d</b>     | 99.9       |
| <b>6d</b>     | 94.8       |
| <b>7d</b>     | 99.3       |
| <b>8d</b>     | 99.7       |
| <b>9d</b>     | 96.8       |

| Compound code | Purity (%) |
|---------------|------------|
| <b>10d</b>    | 99.9       |
| <b>11d</b>    | 99.3       |
| <b>12d</b>    | 99.8       |
| <b>13d</b>    | 99.9       |
| <b>14d</b>    | 96.8       |
| <b>15d</b>    | 99.6       |
| <b>16d</b>    | 99.2       |
| <b>17d</b>    | 96.6       |

**Table S1.** Crystallographic data for MERS 3CLpro.

| Compound Code                                            | 13c                                              | 14d                                              | 15d                                              | 16d                                        | 17d                                              |
|----------------------------------------------------------|--------------------------------------------------|--------------------------------------------------|--------------------------------------------------|--------------------------------------------|--------------------------------------------------|
| PDB Code                                                 | 7TQ7                                             | 7TQ8                                             | 8CZT                                             | 8DGY                                       | 8CZV                                             |
| <b>Data Collection</b>                                   |                                                  |                                                  |                                                  |                                            |                                                  |
| Unit-cell parameters (Å, °)                              | a=101.44<br>b=57.94<br>c=49.85<br>$\beta$ =112.4 | a=100.73<br>b=57.61<br>c=49.74<br>$\beta$ =112.2 | a=101.62<br>b=56.94<br>c=49.83<br>$\beta$ =112.4 | a=100.44 b=57.31<br>c=49.68 $\beta$ =112.2 | a=101.47<br>b=57.45<br>c=49.86<br>$\beta$ =112.5 |
| Space group                                              | C2                                               | C2                                               | C2                                               | C2                                         | C2                                               |
| Resolution (Å) <sup>1</sup>                              | 49.29-1.70<br>(1.73-1.70)                        | 49.01-1.65<br>(1.68-1.65)                        | 48.69-2.10<br>(2.15-2.10)                        | 48.79-2.70 (2.77-<br>2.70)                 | 48.99-1.95<br>(2.00-1.95)                        |
| Wavelength (Å)                                           | 1.0000                                           | 1.0000                                           | 0.9795                                           | 0.9795                                     | 0.9795                                           |
| Temperature (K)                                          | 100                                              | 100                                              | 100                                              | 100                                        | 100                                              |
| Observed reflections                                     | 101,432                                          | 162,225                                          | 50,621                                           | 25,372                                     | 68,418                                           |
| Unique reflections                                       | 29,349                                           | 31,177                                           | 14,941                                           | 6,987                                      | 19,245                                           |
| $\langle I/\sigma(I) \rangle$ <sup>1</sup>               | 11.3 (1.8)                                       | 10.1 (2.5)                                       | 10.6 (2.9)                                       | 7.0 (2.2)                                  | 9.8 (1.8)                                        |
| Completeness (%) <sup>1</sup>                            | 99.6 (97.3)                                      | 98.2 (94.0)                                      | 96.5 (99.5)                                      | 95.7 (99.9)                                | 99.5 (99.7)                                      |
| Multiplicity <sup>1</sup>                                | 3.5 (3.1)                                        | 5.2 (4.4)                                        | 3.4 (3.4)                                        | 3.6 (3.8)                                  | 3.5 (3.6)                                        |
| $R_{\text{merge}}$ (%) <sup>1,2</sup>                    | 6.0 (66.9)                                       | 8.5 (77.7)                                       | 6.6 (35.9)                                       | 14.1 (69.1)                                | 8.9 (66.1)                                       |
| $R_{\text{meas}}$ (%) <sup>1,4</sup>                     | 7.1 (80.9)                                       | 9.5 (88.3)                                       | 8.4 (43.2)                                       | 16.5 (80.2)                                | 9.9 (72.8)                                       |
| $R_{\text{pim}}$ (%) <sup>1,4</sup>                      | 3.8 (45.1)                                       | 4.2 (41.0)                                       | 4.3 (22.8)                                       | 8.6 (40.4)                                 | 5.5 (40.5)                                       |
| CC <sub>1/2</sub> <sup>1,5</sup>                         | 0.998<br>(0.718)                                 | 0.997<br>(0.716)                                 | 0.998<br>(0.933)                                 | 0.994 (0.800)                              | 0.997<br>(0.840)                                 |
| <b>Refinement</b>                                        |                                                  |                                                  |                                                  |                                            |                                                  |
| Resolution (Å) <sup>1</sup>                              | 46.10-1.70                                       | 46.05-1.65                                       | 48.69-2.10                                       | 46.49-2.70                                 | 48.99-1.95                                       |
| Reflections (working/test) <sup>1</sup>                  | 27,890/1,448                                     | 29,587/1,566                                     | 14,231/688                                       | 6,636/330                                  | 18,350/968                                       |
| $R_{\text{factor}} / R_{\text{free}}$ (%) <sup>1,3</sup> | 15.9/19.0                                        | 15.9/19.1                                        | 20.0/26.2                                        | 21.2/25.8                                  | 18.4/24.1                                        |
| No. of atoms (Protein/Ligand/Water)                      | 2,280/58/205                                     | 2,281/58/226                                     | 2,270/32/53                                      | 2,269/33/-                                 | 2,269/68/85                                      |
| <b>Model Quality</b>                                     |                                                  |                                                  |                                                  |                                            |                                                  |
| R.m.s deviations                                         |                                                  |                                                  |                                                  |                                            |                                                  |
| Bond lengths (Å)                                         | 0.011                                            | 0.009                                            | 0.002                                            | 0.003                                      | 0.007                                            |
| Bond angles (°)                                          | 1.003                                            | 1.044                                            | 0.488                                            | 0.557                                      | 0.865                                            |
| Average B-factor (Å <sup>2</sup> )                       |                                                  |                                                  |                                                  |                                            |                                                  |
| All Atoms                                                | 26.0                                             | 25.8                                             | 40.4                                             | 48.2                                       | 35.2                                             |
| Protein                                                  | 25.3                                             | 24.9                                             | 40.5                                             | 48.1                                       | 35.3                                             |
| Ligand                                                   | 25.1                                             | 25.2                                             | 37.7                                             | 52.3                                       | 35.5                                             |

|                                          |      |      |      |      |      |
|------------------------------------------|------|------|------|------|------|
| Water                                    | 33.7 | 34.3 | 38.4 | -    | 33.1 |
| Coordinate error(maximum likelihood) (Å) | 0.17 | 0.17 | 0.24 | 0.31 | 0.26 |
| Ramachandran Plot                        |      |      |      |      |      |
| Most favored (%)                         | 99.7 | 99.0 | 98.3 | 95.3 | 98.3 |
| Additionally allowed (%)                 | 0.3  | 1.0  | 1.7  | 4.7  | 1.7  |

- 1) Values in parenthesis are for the highest resolution shell.
- 2)  $R_{\text{merge}} = \frac{\sum_{hkl} \sum_i |I_i(hkl) - \langle I(hkl) \rangle|}{\sum_{hkl} \sum_i I_i(hkl)}$ , where  $I_i(hkl)$  is the intensity measured for the  $i$ th reflection and  $\langle I(hkl) \rangle$  is the average intensity of all reflections with indices  $hkl$ .
- 3)  $R_{\text{factor}} = \frac{\sum_{hkl} ||F_{\text{obs}}(hkl) - |F_{\text{calc}}(hkl)||}{\sum_{hkl} |F_{\text{obs}}(hkl)|}$ ;  $R_{\text{free}}$  is calculated in an identical manner using 5% of randomly selected reflections that were not included in the refinement.
- 4)  $R_{\text{meas}}$  = redundancy-independent (multiplicity-weighted)  $R_{\text{merge}}$ <sup>74</sup>.  $R_{\text{pim}}$  = precision-indicating (multiplicity-weighted)  $R_{\text{merge}}$ <sup>75,76</sup>.
- 5)  $CC_{1/2}$  is the correlation coefficient of the mean intensities between two random half-sets of data<sup>77,78</sup>.



**Table S2.** Crystallographic data for SARS-CoV-2 3CLpro.

| Compound Code                                                            | 1c                                           | 5c                                       | 6c                                        | 10d                                      | 13d                                      | 15d                                      | 17d                                      |
|--------------------------------------------------------------------------|----------------------------------------------|------------------------------------------|-------------------------------------------|------------------------------------------|------------------------------------------|------------------------------------------|------------------------------------------|
| PDB Code                                                                 | 7TQ2                                         | 7TQ3                                     | 7TQ4                                      | 7TQ5                                     | 7TQ6                                     | 8CZW                                     | 8CZX                                     |
| <b>Data Collection</b>                                                   |                                              |                                          |                                           |                                          |                                          |                                          |                                          |
| Unit-cell parameters (Å, °)                                              | a=45.59,<br>b=54.61,<br>c=114.32,<br>β=101.0 | a=54.25<br>b=98.85<br>c=58.58<br>β=107.6 | a=113.88<br>b=53.87<br>c=45.62<br>β=101.6 | a=55.38<br>b=98.44<br>c=59.28<br>β=108.3 | a=55.26<br>b=98.72<br>c=58.92<br>β=108.2 | a=55.17<br>b=98.53<br>c=59.14<br>β=108.0 | a=54.86<br>b=98.50<br>c=58.68<br>β=107.7 |
| Space group                                                              | <i>P</i> 2 <sub>1</sub>                      | <i>P</i> 2 <sub>1</sub>                  | <i>P</i> 2 <sub>1</sub>                   | <i>P</i> 2 <sub>1</sub>                  | <i>P</i> 2 <sub>1</sub>                  | <i>P</i> 2 <sub>1</sub>                  | <i>P</i> 2 <sub>1</sub>                  |
| Resolution (Å) <sup>1</sup>                                              | 49.11-2.30<br>(2.38-2.30)                    | 48.61-2.00<br>(2.05-2.00)                | 48.51-2.45<br>(2.55-2.45)                 | 48.86-1.65<br>(1.68-1.65)                | 48.69-1.55<br>(1.58-1.55)                | 46.31-1.70<br>(1.73-1.70)                | 48.63-1.65<br>(1.68-1.65)                |
| Wavelength (Å)                                                           | 1.0000                                       | 1.0000                                   | 1.0000                                    | 1.0000                                   | 1.0000                                   | 0.9795                                   | 0.9795                                   |
| Temperature (K)                                                          | 100                                          | 100                                      | 100                                       | 100                                      | 100                                      | 100                                      | 100                                      |
| Observed reflections                                                     | 86,865                                       | 138,606                                  | 35,501                                    | 250,742                                  | 300,837                                  | 231,847                                  | 254,941                                  |
| Unique reflections                                                       | 24,770                                       | 40,112                                   | 10,065                                    | 72,411                                   | 86,805                                   | 65,228                                   | 58,790                                   |
| <I/σ(I)> <sup>1</sup>                                                    | 7.3 (2.2)                                    | 12.2 (1.9)                               | 8.5 (1.8)                                 | 11.2 (1.6)                               | 13.2 (1.8)                               | 11.2 (1.9)                               | 11.5 (1.6)                               |
| Completeness (%) <sup>1</sup>                                            | 99.9 (99.8)                                  | 98.9 (99.7)                              | 99.7 (100)                                | 99.9 (100)                               | 99.9 (99.9)                              | 98.8 (99.3)                              | 98.3 (97.5)                              |
| Multiplicity <sup>1</sup>                                                | 3.5 (3.6)                                    | 3.5 (3.6)                                | 3.5 (3.6)                                 | 3.5 (3.4)                                | 3.5 (3.5)                                | 3.6 (3.6)                                | 3.6 (3.8)                                |
| <i>R</i> <sub>merge</sub> (%) <sup>1,2</sup>                             | 11.2 (60.9)                                  | 5.9 (76.9)                               | 9.8 (64.3)                                | 5.4 (74.9)                               | 4.2 (71.2)                               | 5.6 (73.9)                               | 3.9 (62.6)                               |
| <i>R</i> <sub>meas</sub> (%) <sup>1,4</sup>                              | 13.3 (71.5)                                  | 7.0 (90.5)                               | 11.6 (75.6)                               | 6.3 (89.3)                               | 4.9 (84.3)                               | 6.5 (86.7)                               | 4.6 (72.8)                               |
| <i>R</i> <sub>pim</sub> (%) <sup>1,4</sup>                               | 7.0 (37.2)                                   | 3.7 (47.3)                               | 6.2 (39.5)                                | 3.3 (48.1)                               | 2.6 (44.7)                               | 3.4 (44.8)                               | 2.4 (36.8)                               |
| CC <sub>1/2</sub> <sup>1,5</sup>                                         | 0.994<br>(0.771)                             | 0.999<br>(0.753)                         | 0.996<br>(0.866)                          | 0.998<br>(0.668)                         | 0.998<br>(0.732)                         | 0.998<br>(0.700)                         | 0.999<br>(0.802)                         |
| <b>Refinement</b>                                                        |                                              |                                          |                                           |                                          |                                          |                                          |                                          |
| Resolution (Å) <sup>1</sup>                                              | 38.79-2.30                                   | 37.01-2.00                               | 34.40-2.45                                | 46.37-1.65                               | 35.96-1.55                               | 28.77-1.70                               | 33.46-1.65                               |
| Reflections (working/test) <sup>1</sup>                                  | 23,533/1,19<br>8                             | 37,986/1,9<br>00                         | 9,537/507                                 | 68,809/3,54<br>6                         | 82,418/4,32<br>8                         | 62,016/3,16<br>4                         | 66,582/3,42<br>2                         |
| <i>R</i> <sub>factor</sub> / <i>R</i> <sub>free</sub> (%) <sup>1,3</sup> | 18.1/26.3                                    | 18.2/24.7                                | 21.3/29.6                                 | 17.9/21.7                                | 18.5/21.6                                | 17.8/21.6                                | 17.8/22.0                                |
| No. of atoms (Protein/Ligand/Water)                                      | 4,407/64/12<br>7                             | 4,389/132/<br>205                        | 2,135/33/3<br>0                           | 4,511/120/3<br>52                        | 4,503/102/3<br>38                        | 4,555/118/4<br>26                        | 4,617/116/4<br>07                        |
| <b>Model Quality</b>                                                     |                                              |                                          |                                           |                                          |                                          |                                          |                                          |
| R.m.s deviations                                                         |                                              |                                          |                                           |                                          |                                          |                                          |                                          |
| Bond lengths (Å)                                                         | 0.009                                        | 0.010                                    | 0.005                                     | 0.010                                    | 0.009                                    | 0.007                                    | 0.007                                    |

|                                            |       |       |       |       |       |       |       |
|--------------------------------------------|-------|-------|-------|-------|-------|-------|-------|
| Bond angles (°)                            | 0.936 | 1.032 | 0.565 | 1.031 | 0.972 | 0.926 | 0.877 |
| Average <i>B</i> -factor (Å <sup>2</sup> ) |       |       |       |       |       |       |       |
| All Atoms                                  | 36.2  | 37.8  | 53.9  | 31.7  | 30.5  | 32.4  | 31.3  |
| Protein                                    | 36.4  | 37.5  | 54.2  | 31.1  | 30.0  | 31.8  | 30.6  |
| Ligand                                     | 36.5  | 45.7  | 44.0  | 33.1  | 28.9  | 33.3  | 31.9  |
| Water                                      | 32.3  | 37.8  | 43.1  | 38.1  | 37.3  | 38.5  | 39.0  |
| Coordinate error(maximum likelihood) (Å)   | 0.36  | 0.27  | 0.36  | 0.23  | 0.20  | 0.20  | 0.19  |
| Ramachandran Plot                          |       |       |       |       |       |       |       |
| Most favored (%)                           | 96.8  | 94.7  | 95.1  | 97.5  | 98.0  | 97.7  | 98.5  |
| Additionally allowed (%)                   | 2.9   | 5.0   | 4.5   | 2.4   | 2.0   | 2.3   | 1.5   |

- 1) Values in parenthesis are for the highest resolution shell.
- 2)  $R_{\text{merge}} = \frac{\sum_{hkl} \sum_i |I_i(hkl) - \langle I(hkl) \rangle|}{\sum_{hkl} \sum_i I_i(hkl)}$ , where  $I_i(hkl)$  is the intensity measured for the  $i$ th reflection and  $\langle I(hkl) \rangle$  is the average intensity of all reflections with indices  $hkl$ .
- 3)  $R_{\text{factor}} = \frac{\sum_{hkl} ||F_{\text{obs}}(hkl) - |F_{\text{calc}}(hkl)||}{\sum_{hkl} |F_{\text{obs}}(hkl)|}$ ;  $R_{\text{free}}$  is calculated in an identical manner using 5% of randomly selected reflections that were not included in the refinement.
- 4)  $R_{\text{meas}}$  = redundancy-independent (multiplicity-weighted)  $R_{\text{merge}}$ <sup>74</sup>.  $R_{\text{pim}}$  = precision-indicating (multiplicity-weighted)  $R_{\text{merge}}$ <sup>75,76</sup>.
- 5)  $CC_{-1/2}$  is the correlation coefficient of the mean intensities between two random half-sets of data<sup>77,78</sup>.
